# Supplementary material for: MicroRNA-21 as a diagnostic and prognostic biomarker of lung cancer: a systematic review and meta-analysis
Source: Oxford University Press journal article supplement (doi:10.1042/bsr20211653), 2022-04-20
Supplement: bsr-2021-1653_supp.pdf [file bsr-2021-1653_supp.pdf]

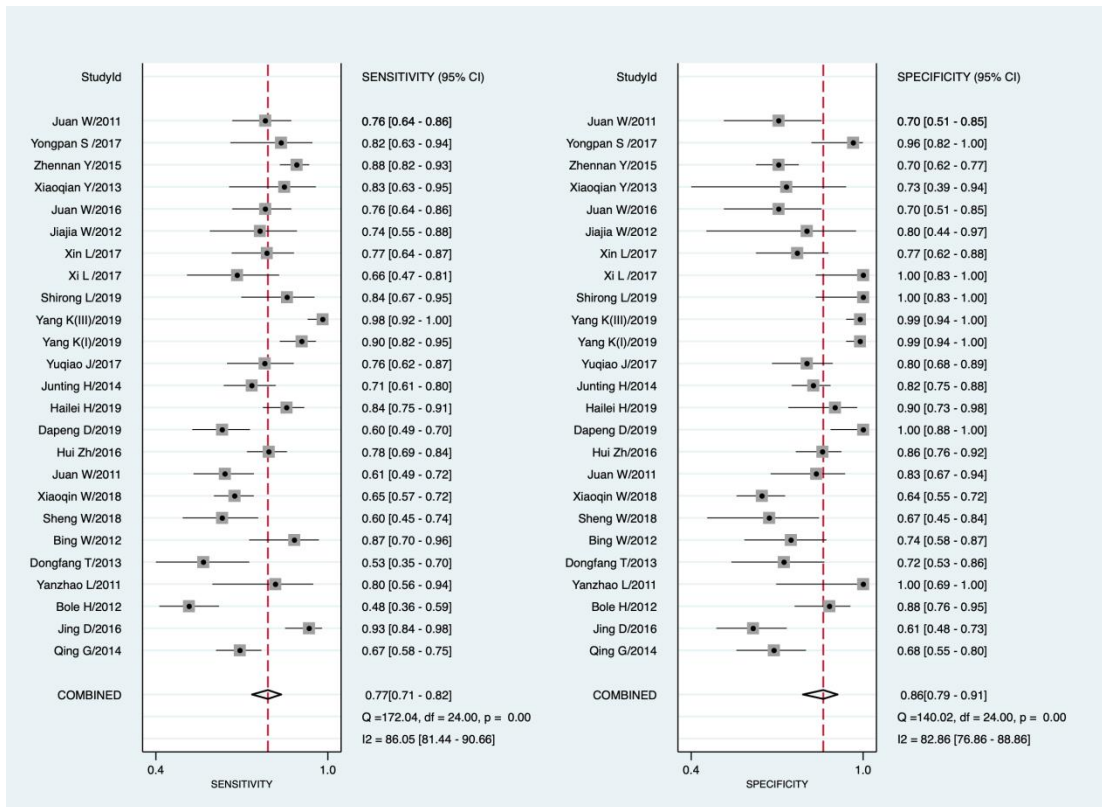

Figure S1. Forest plot of sensitivity and specificity of miRNA-21 in diagnosis of lung cancer (China).

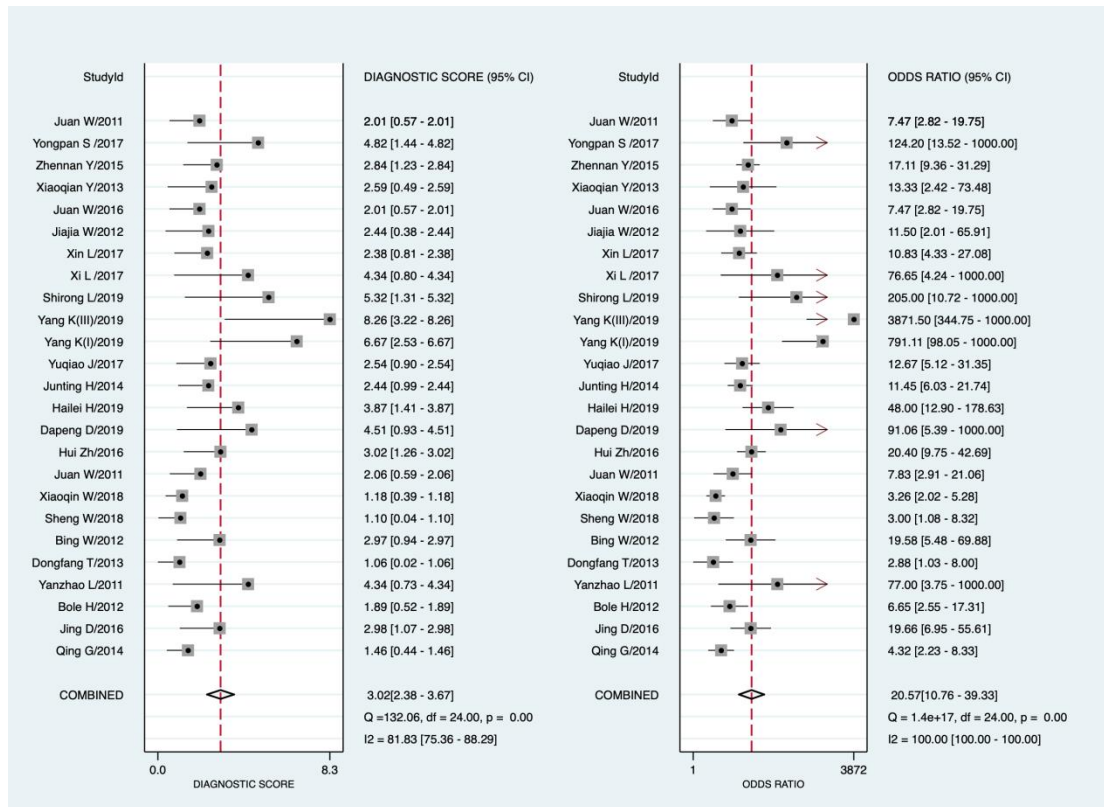

Figure S2. Forest plots of odds ratio of miRNA-21 in diagnosis of lung cancer (China).

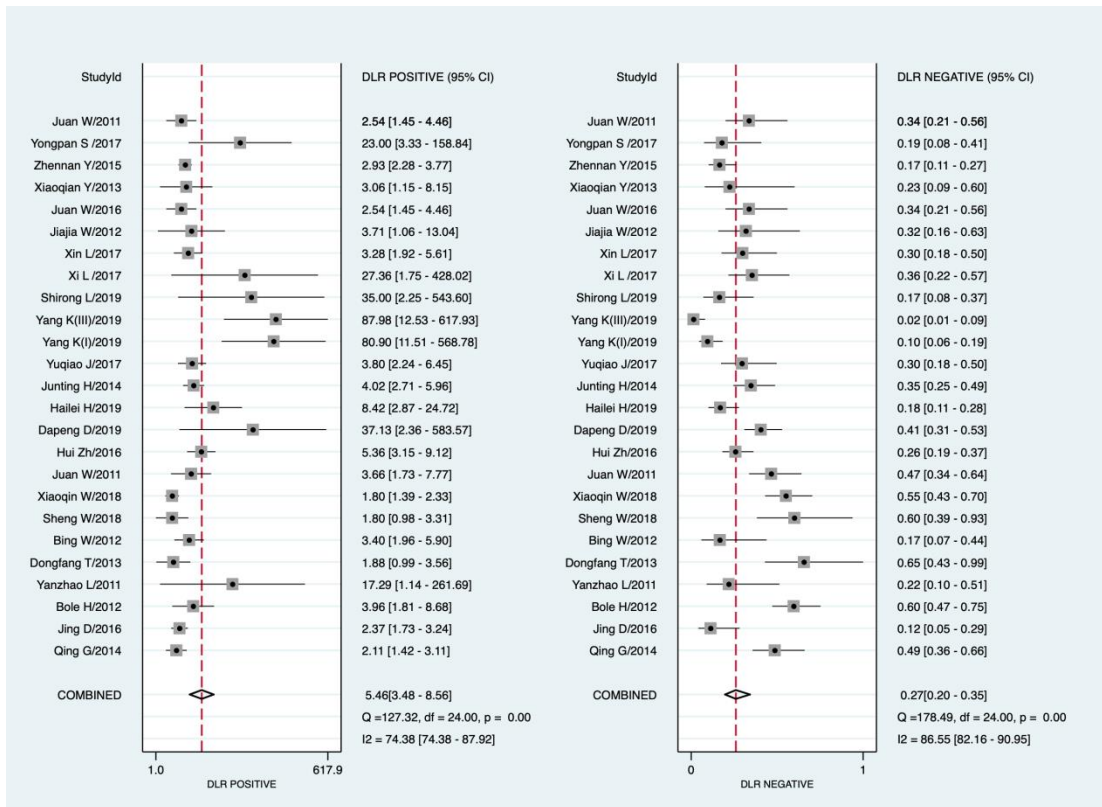

Figure S3. Forest plots of DLR positivity and DLR negativity of miRNA-21 in diagnosis of lung cancer (China).

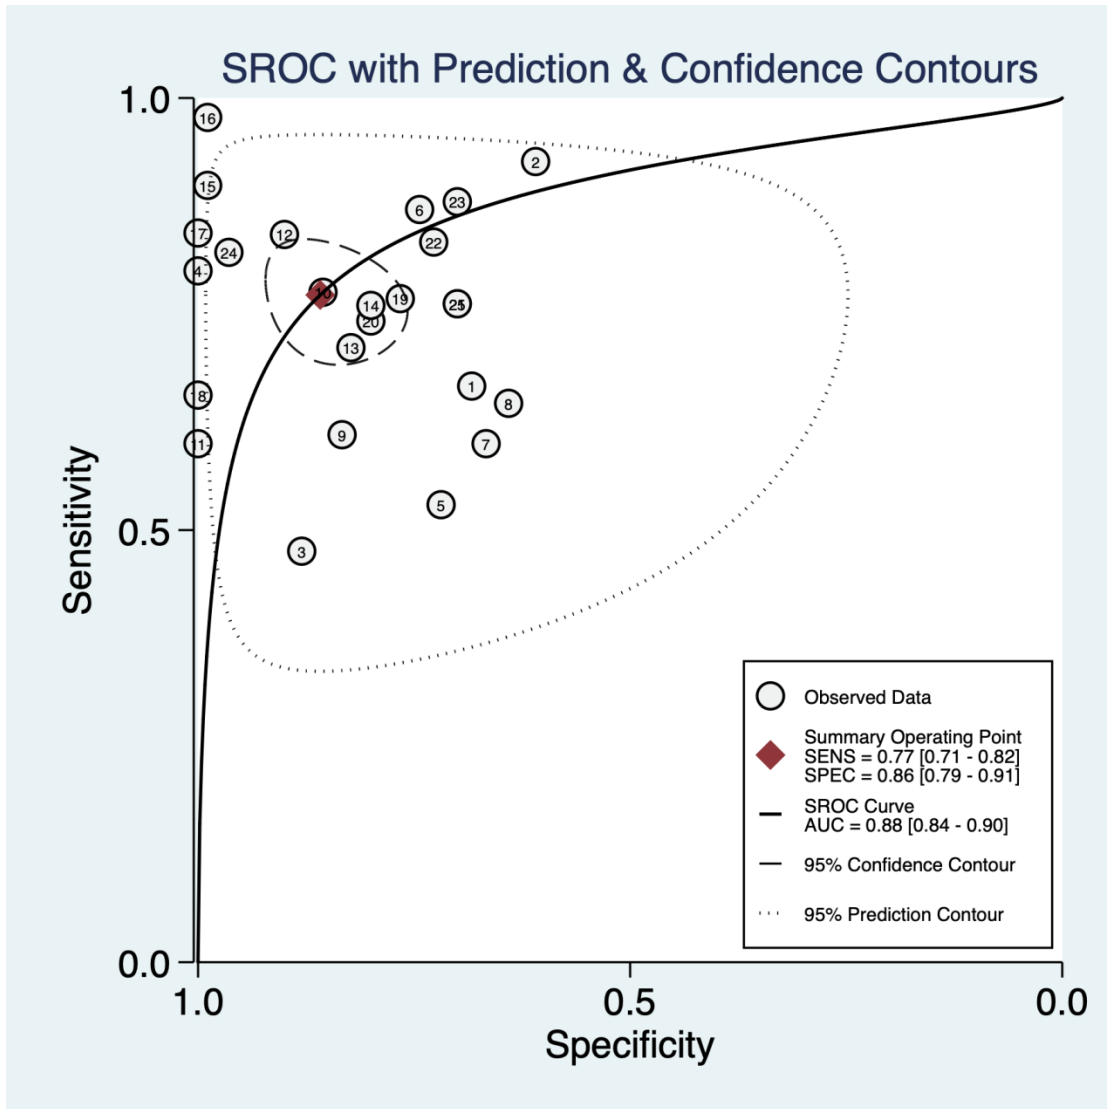

Figure S4. SROC curves of miRNA-21 for diagnosis of lung cancer (China).

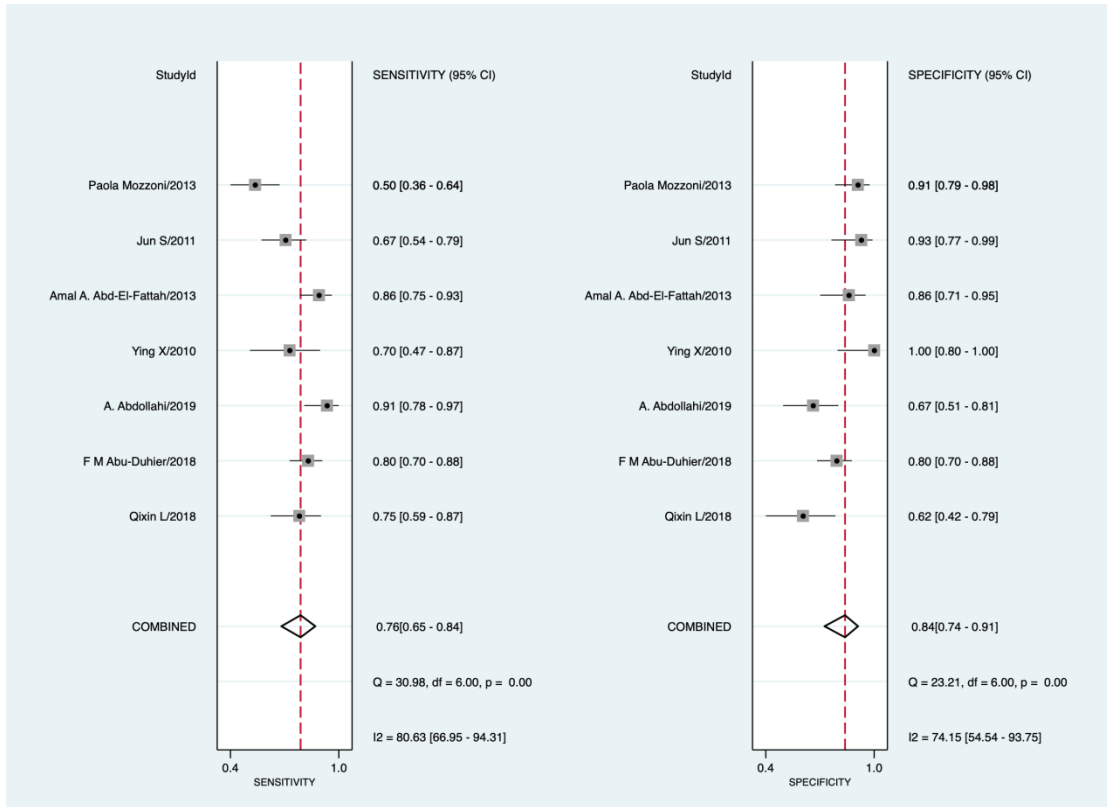

Figure S5. Forest plot of sensitivities and specificities of miRNA-21 in diagnosis of lung cancer (Non-China).

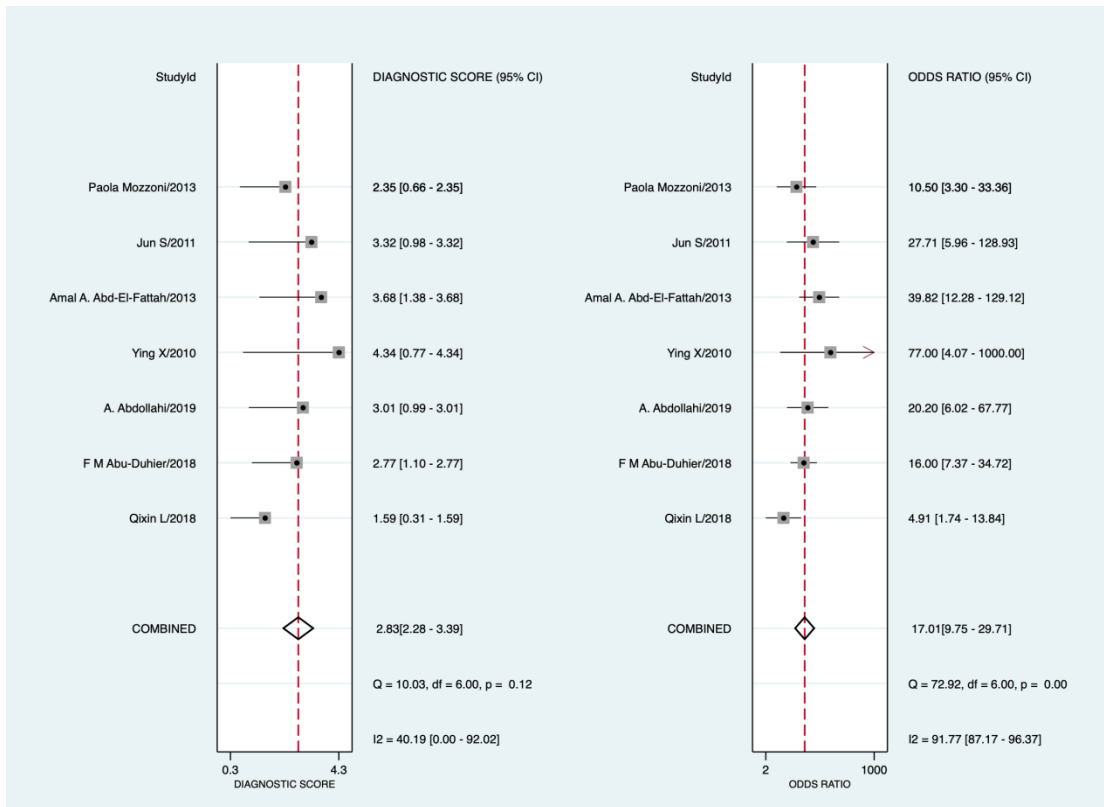

Figure S6. Forest plots of odds ratio of miRNA-21 in diagnosis of lung cancer (Non-China).

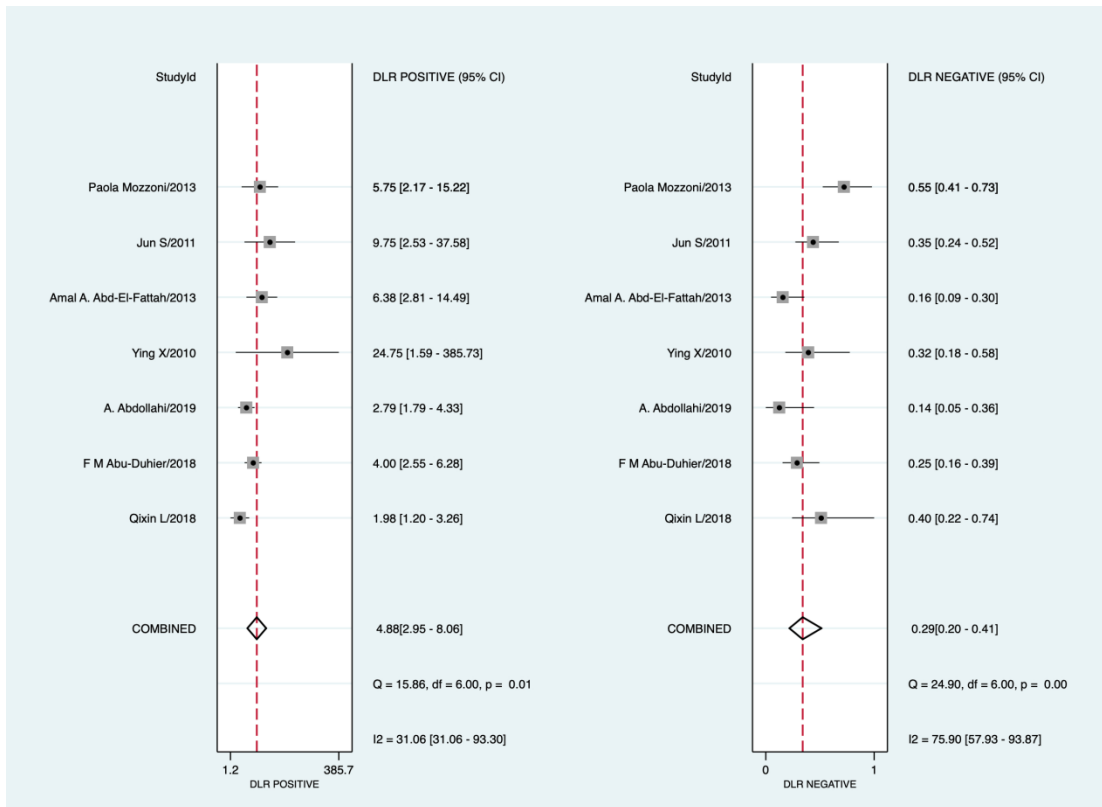

Figure S7. Forest plots of DLR positivity and DLR negativity of miRNA-21 in diagnosis of lung cancer (Non-China).

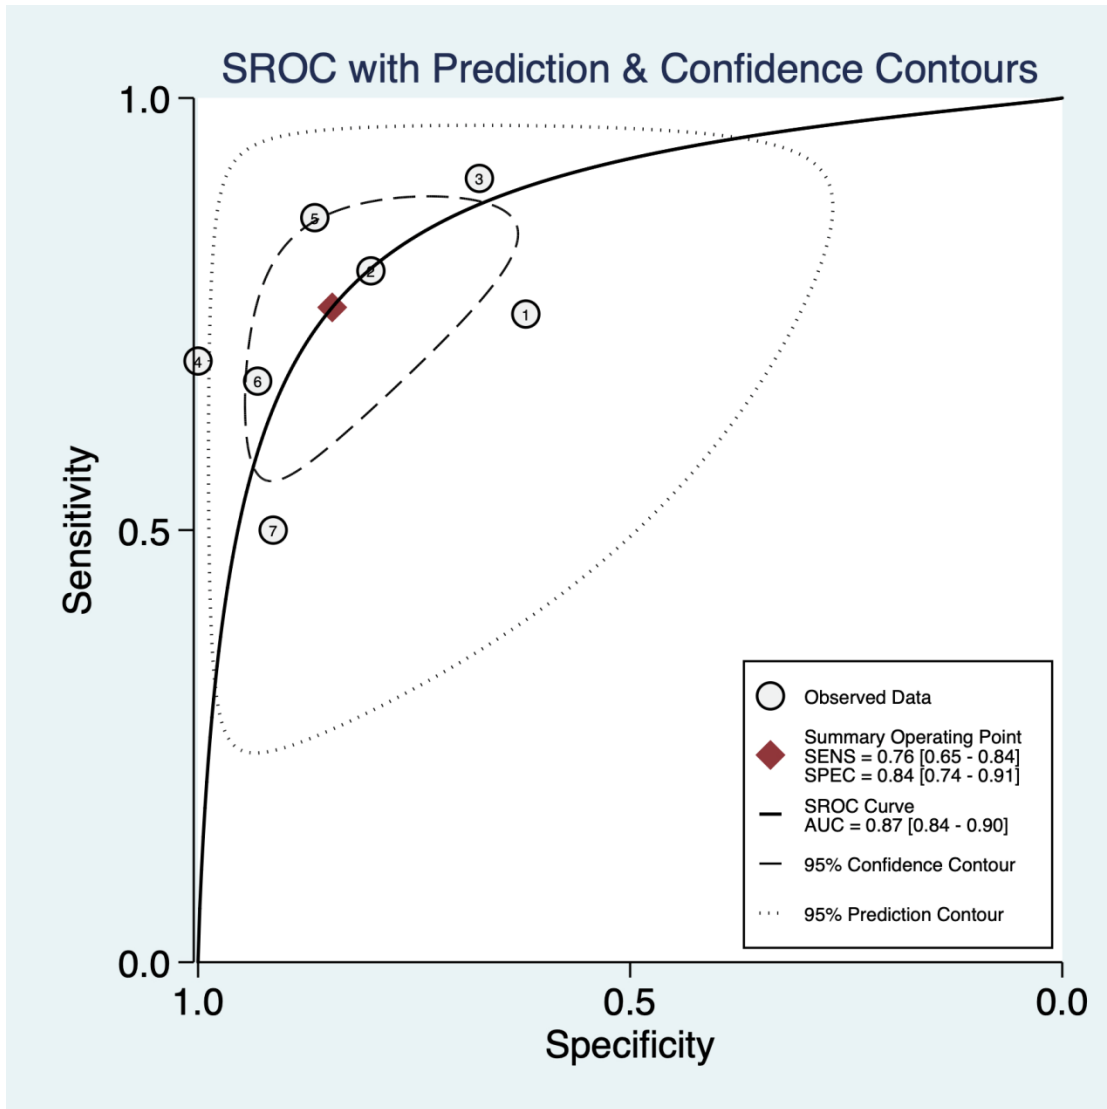

Figure S8: SROC curves of miRNA-21 for diagnosis of lung cancer (Non-China).



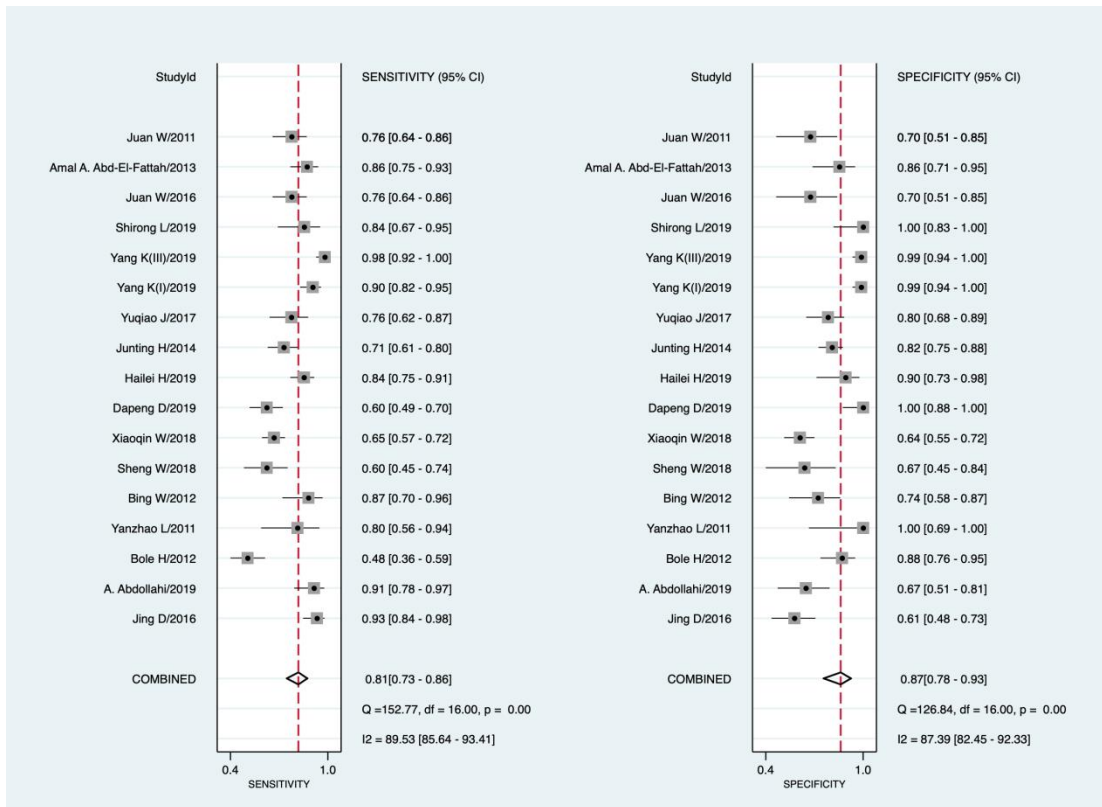

Figure S9. Forest plot of the sensitivities and specificities of miRNA-21 in diagnosis of lung cancer (Serum).

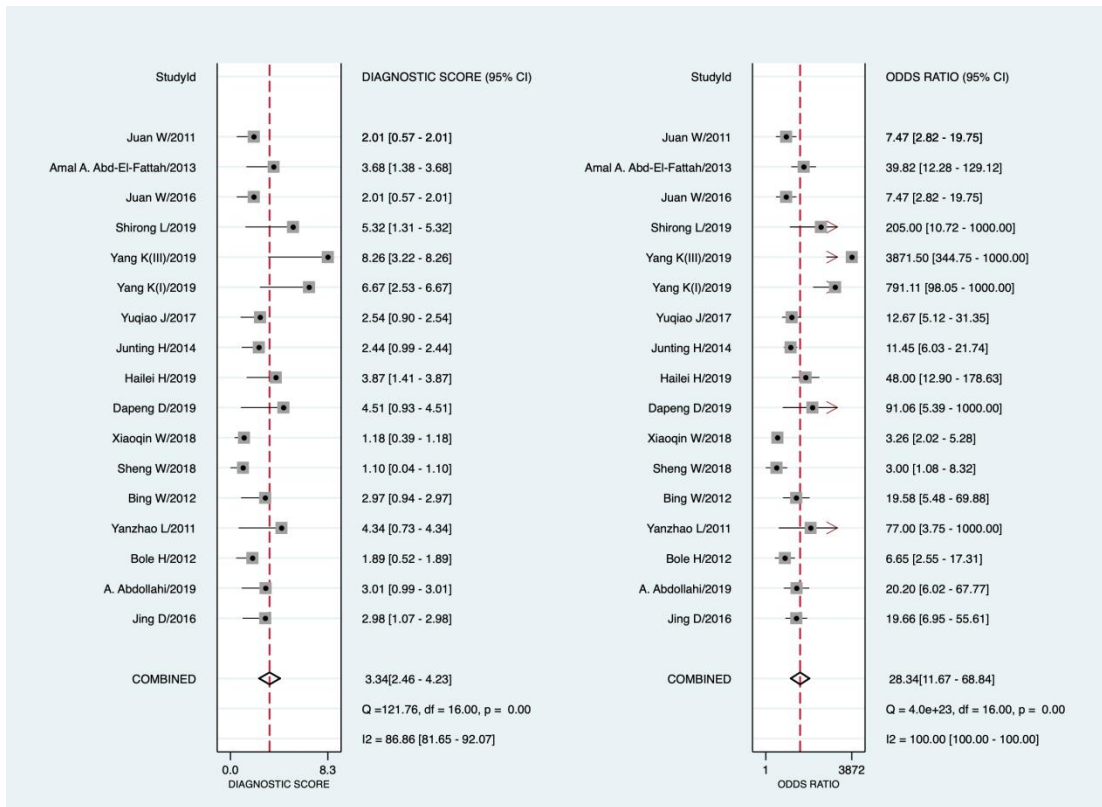

Figure S10. Forest plots of odds ratio of miRNA-21 in diagnosis of lung cancer (Serum).

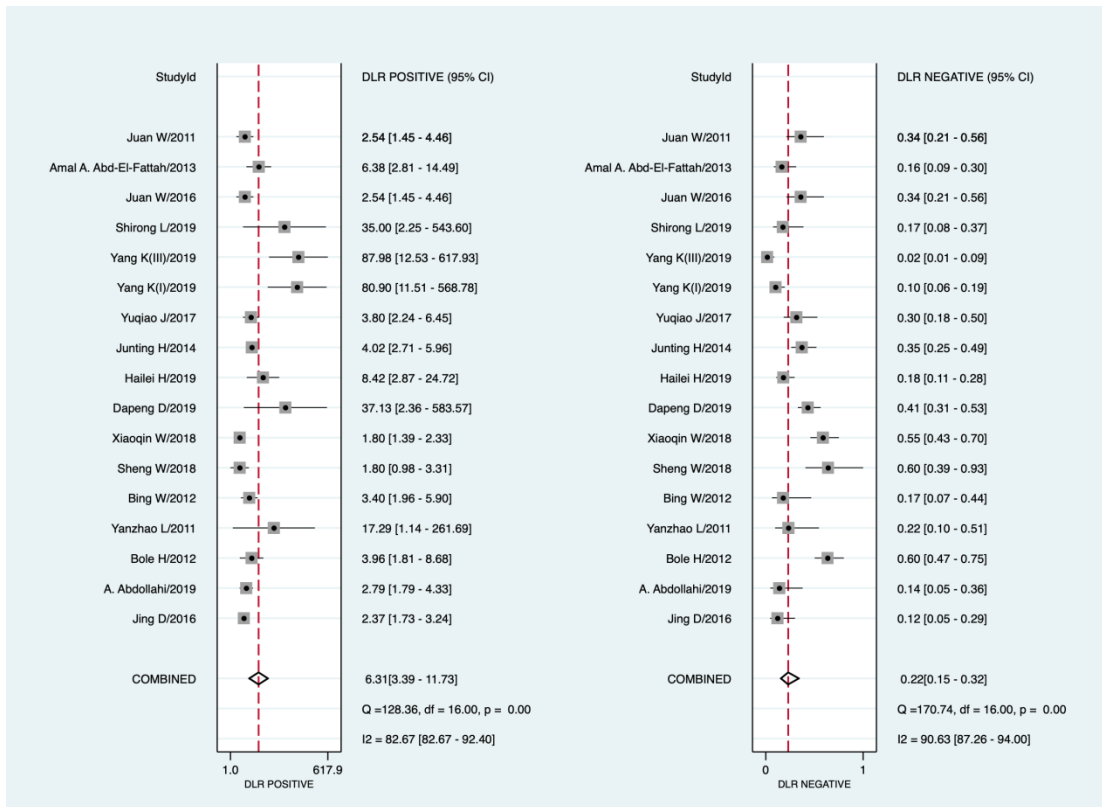

Figure S11. Forest plots of DLR positivity and DLR negativity of miRNA-21 in diagnosis of lung cancer (Serum).

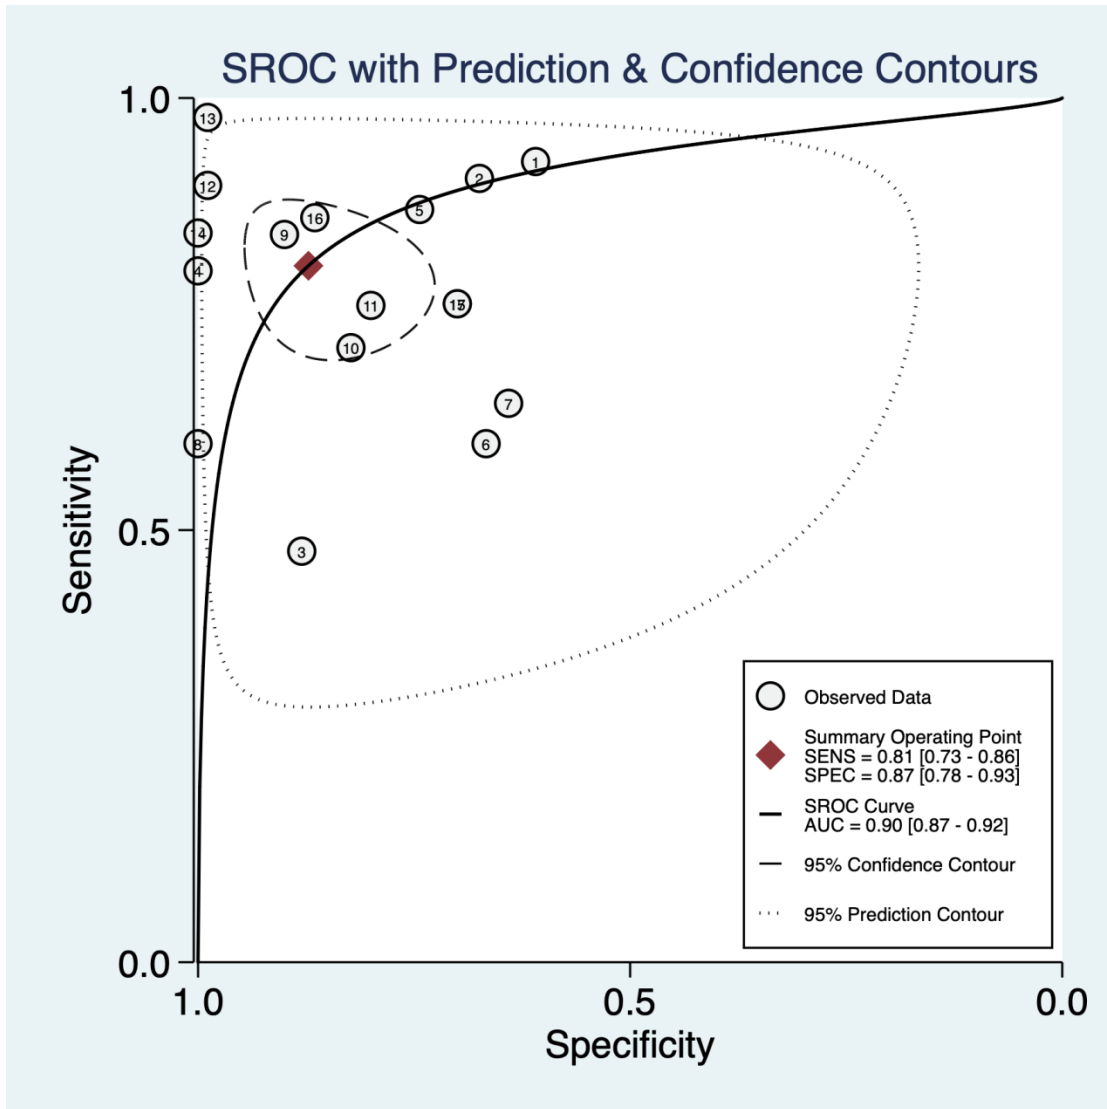

Figure S12. SROC curves of miRNA-21 in diagnosis of lung cancer (Serum).

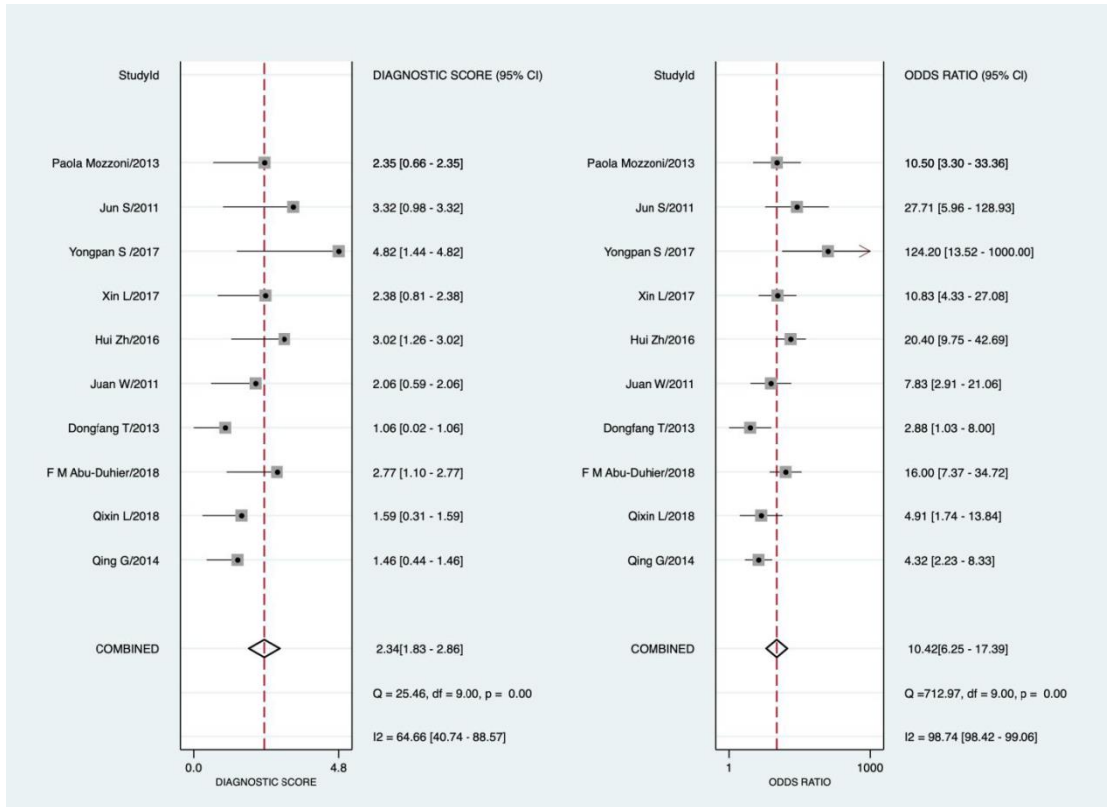

Figure S13. Forest plot of sensitivities and specificities of miRNA-21 in diagnosis of lung cancer (Plasma).

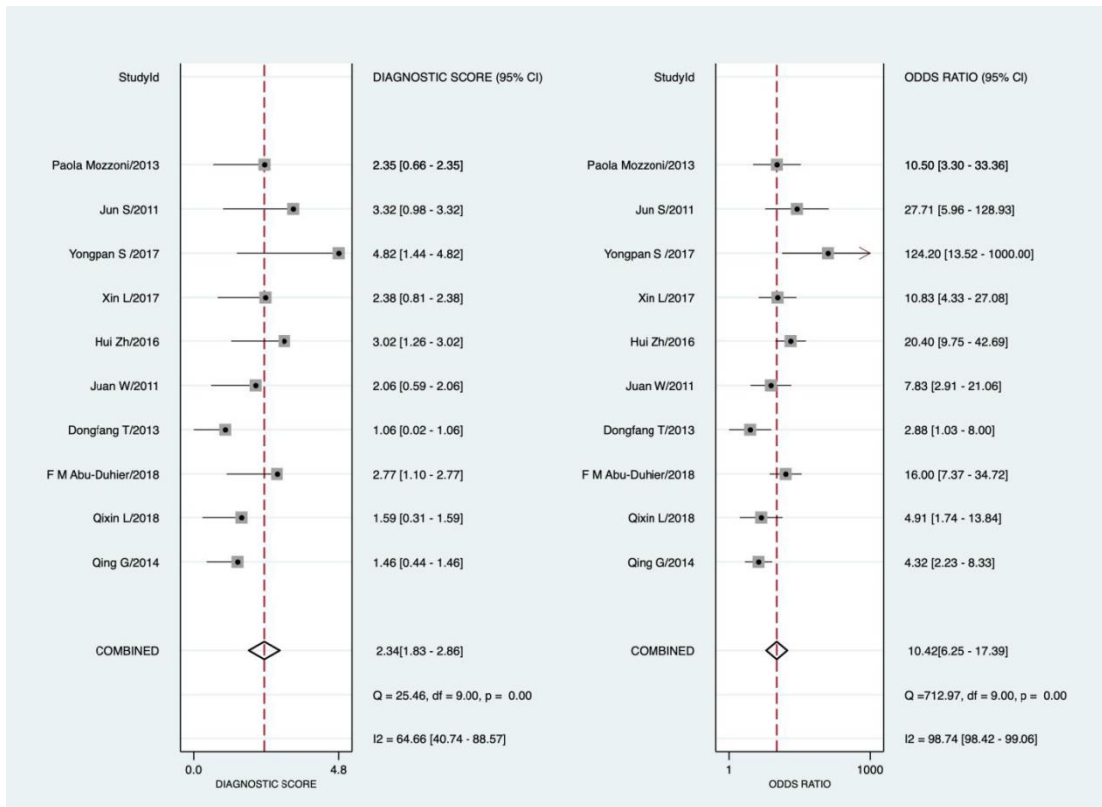

Figure S14. Forest plots of odds ratio of miRNA-21 in diagnosis of lung cancer (Plasma).

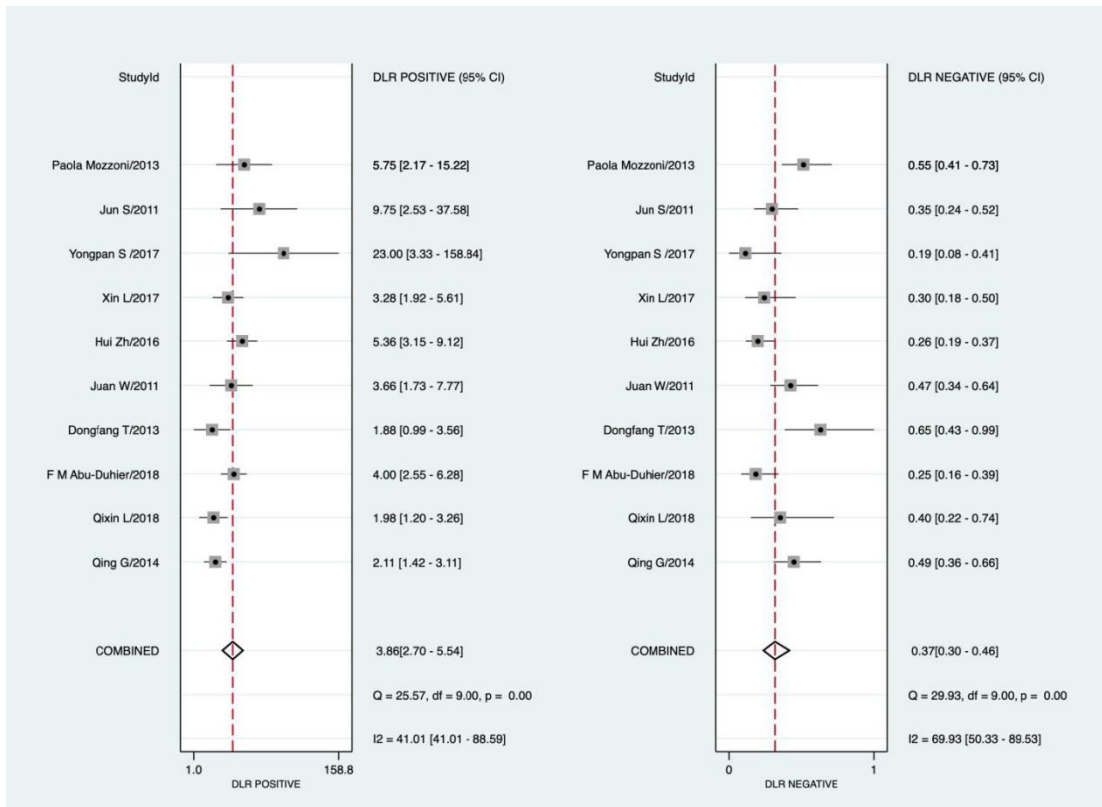

Figure S15. Forest plots of DLR positivity and DLR negativity of miRNA-21 in diagnosis of lung cancer (Plasma).

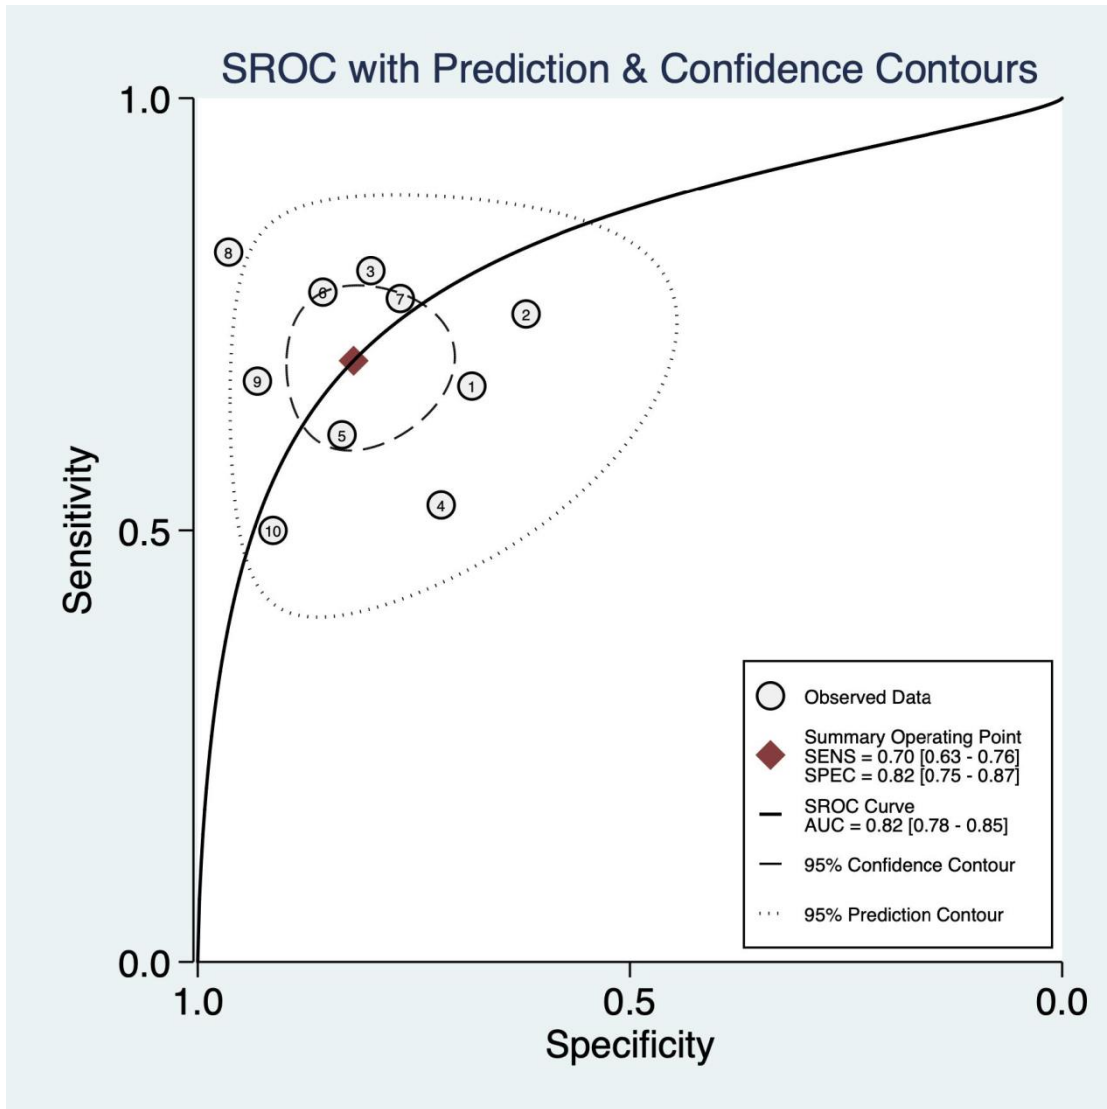

Figure S16. SROC curves of miRNA-21 for diagnosis of lung cancer (Plasma).



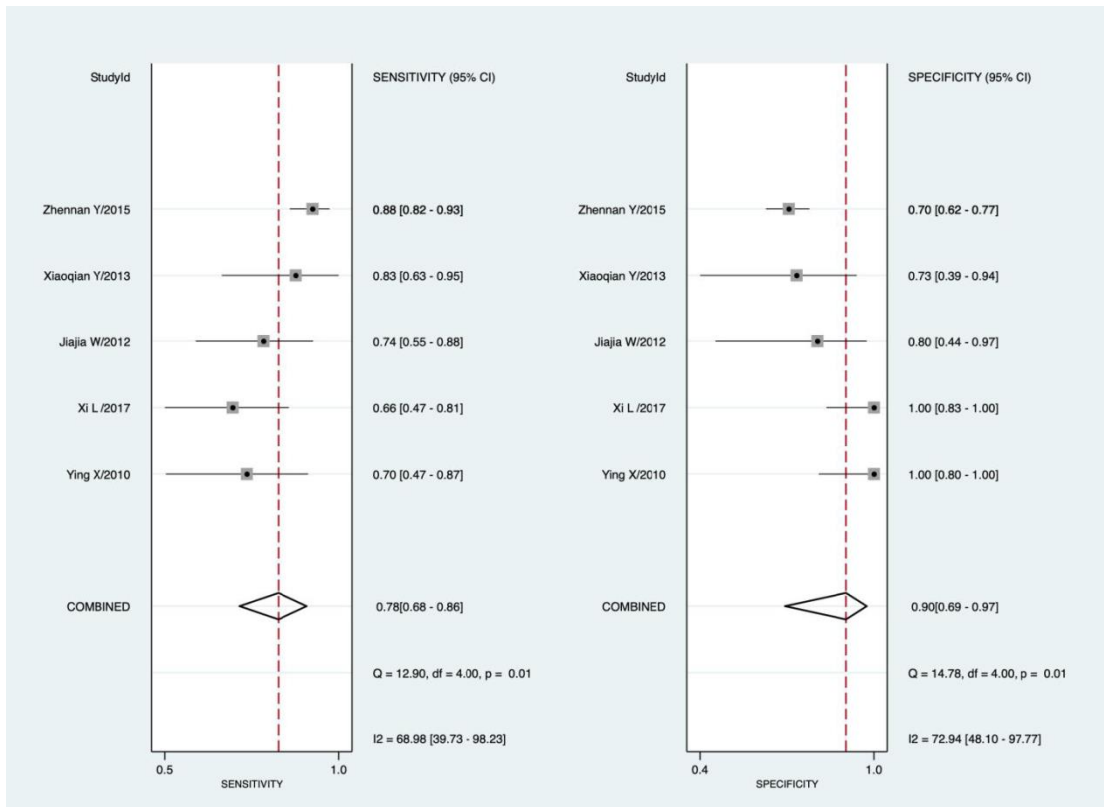

Figure S17. Forest plot of sensitivities and specificities of miRNA-21 in diagnosis of lung cancer (Other specimens).

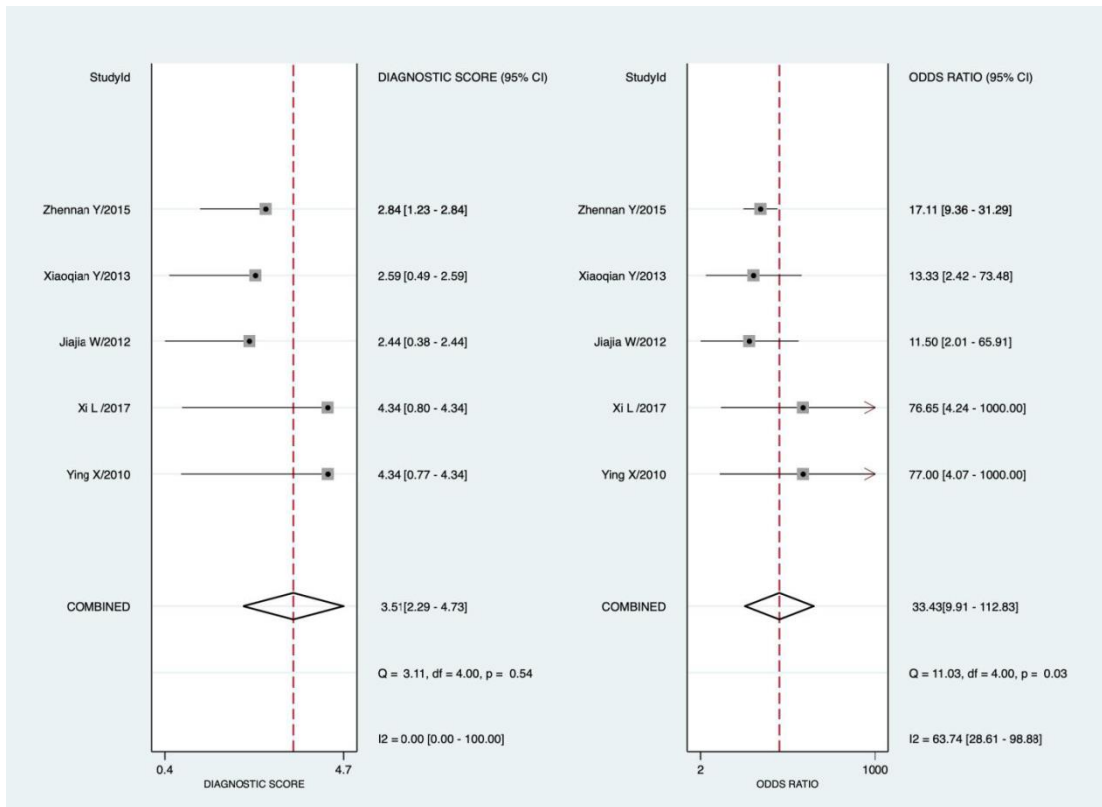

Figure S18. Forest plots of odds ratio of miRNA-21 in diagnosis of lung cancer (Other specimens).

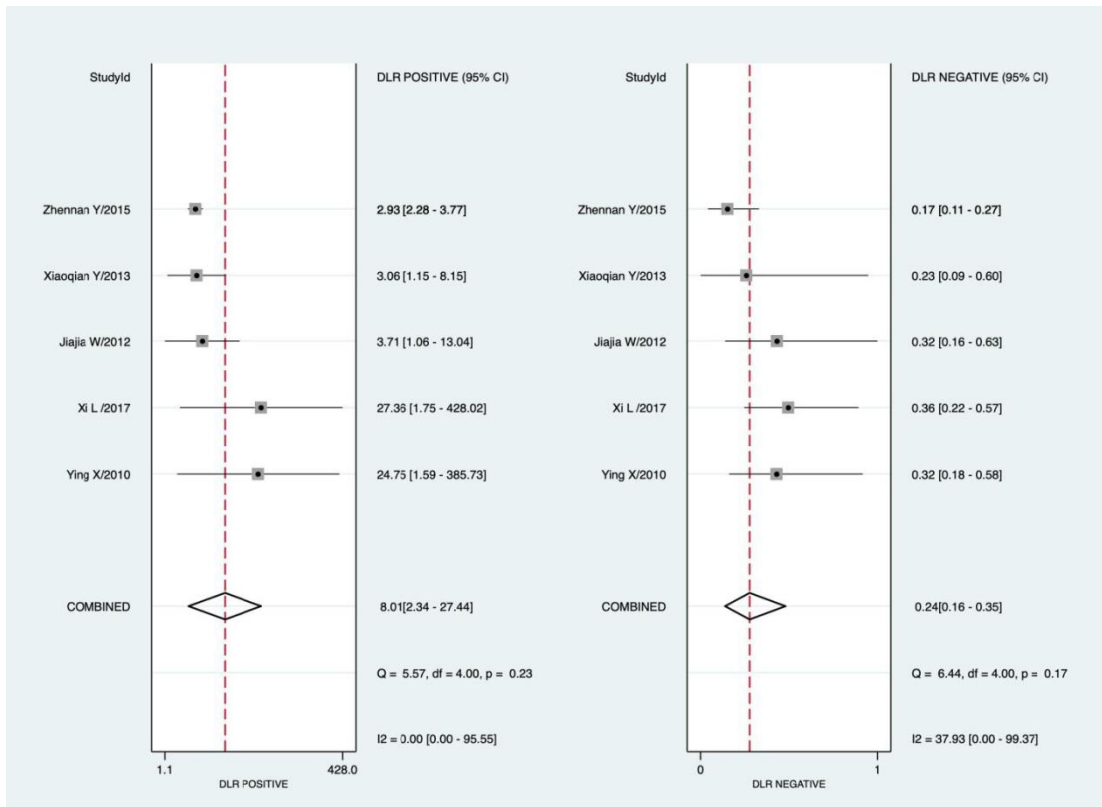

Figure S19. Forest plots of DLR positivity and DLR negativity of miRNA-21 in diagnosis of lung cancer (Other specimens).

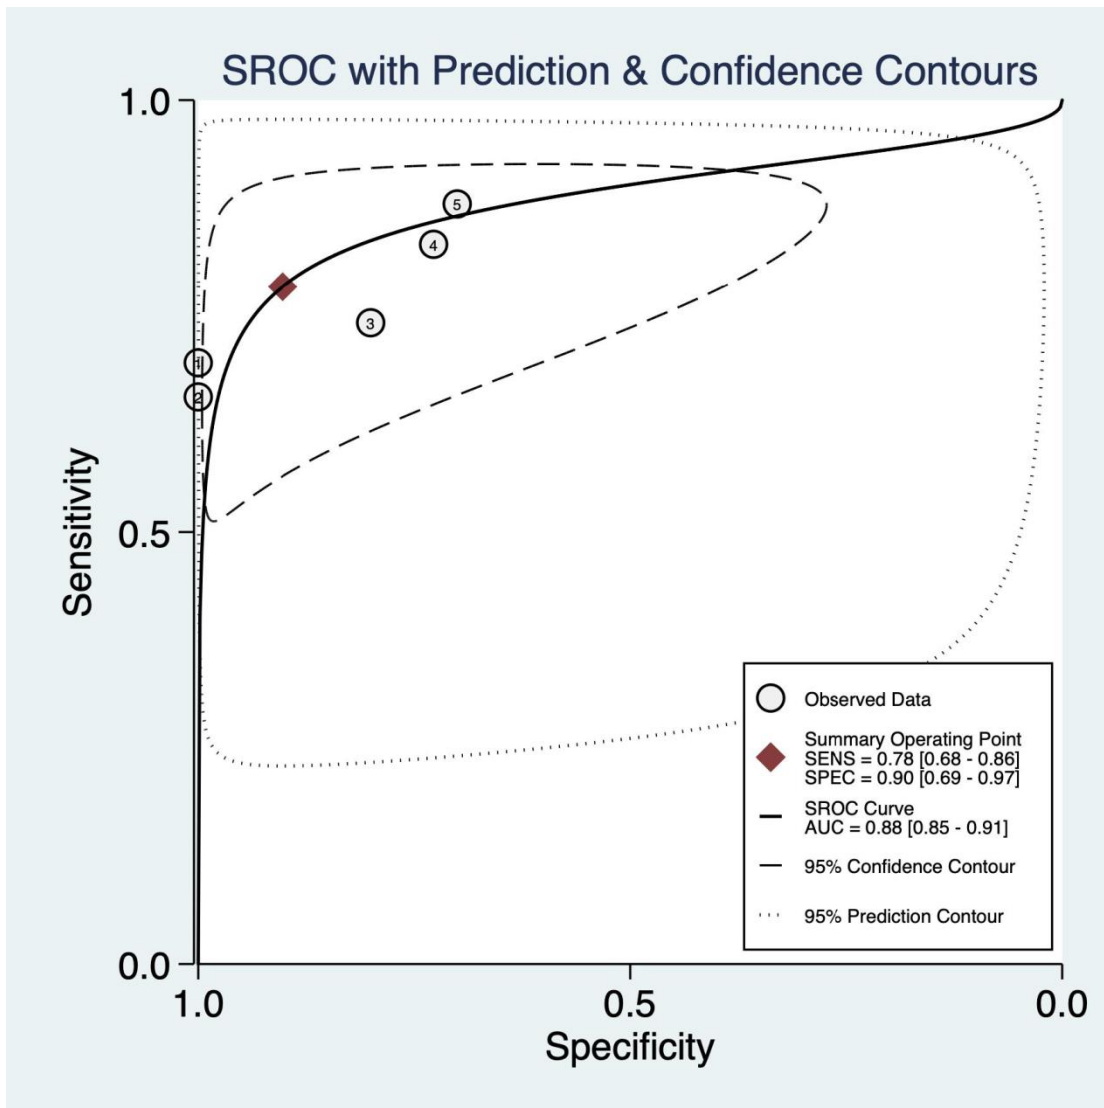

Figure S20. SROC curves of miRNA-21 for diagnosis of lung cancer (Other specimens).

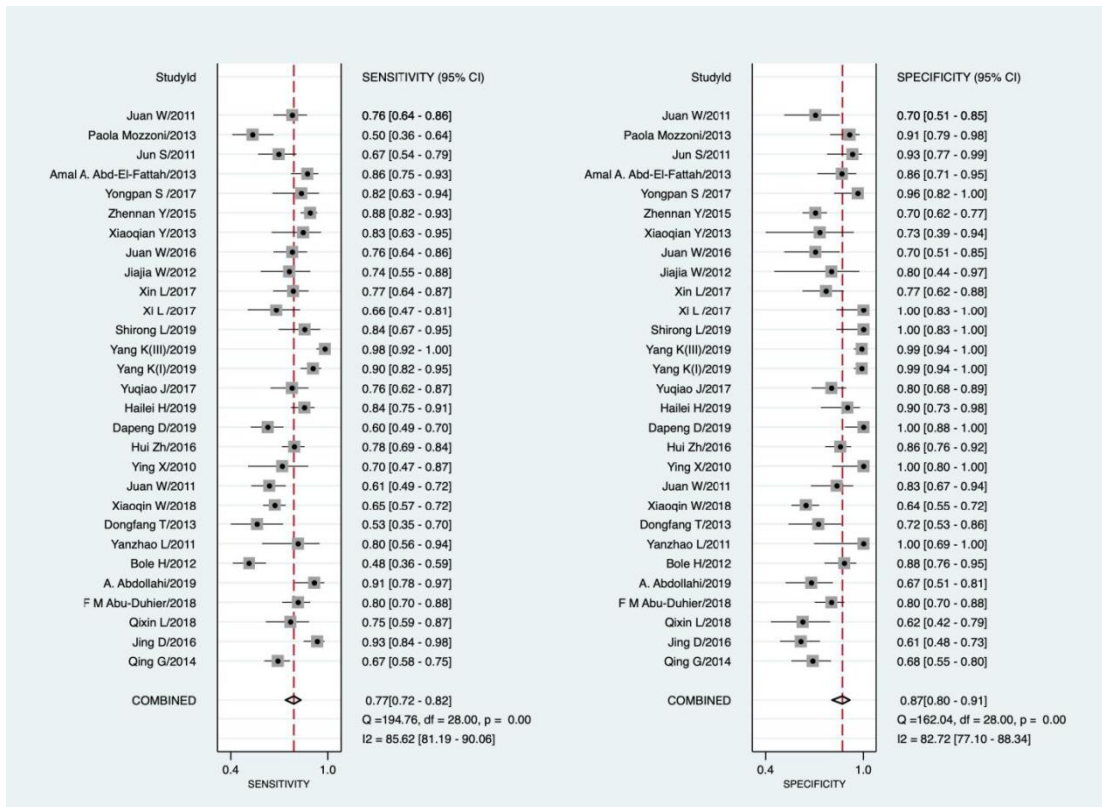

Figure S21. Forest plot of sensitivities and specificities of miRNA-21 in diagnosis of lung cancer (NSCLC).

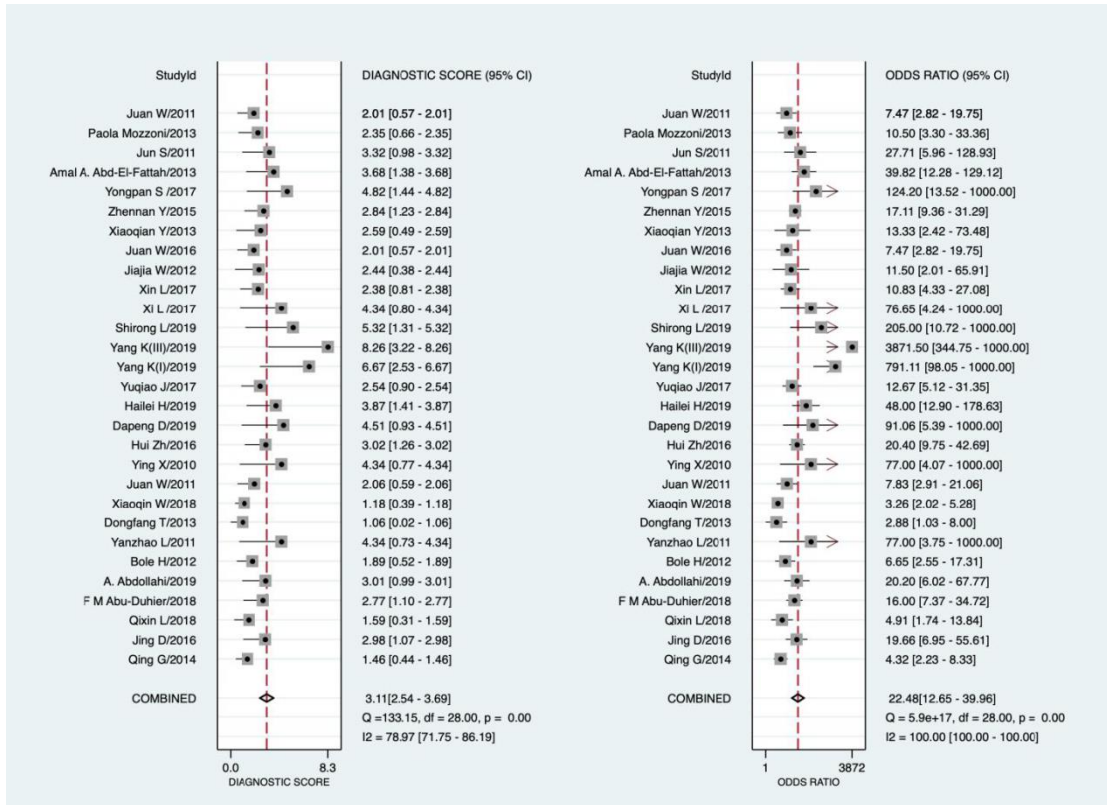

Figure S22. Forest plots of odds ratio of miRNA-21 in diagnosis of lung cancer (NSCLC).

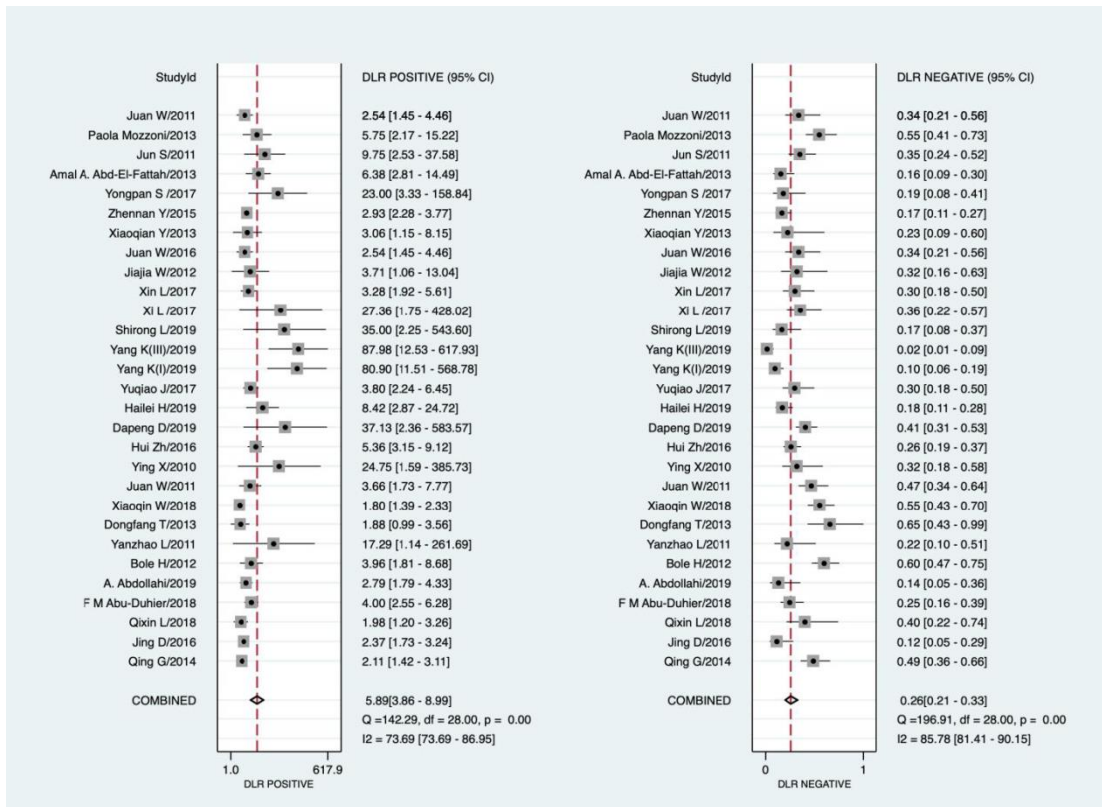

Figure S23. Forest plots of DLR positivity and DLR negativity of miRNA-21 in diagnosis of lung cancer (NSCLC).

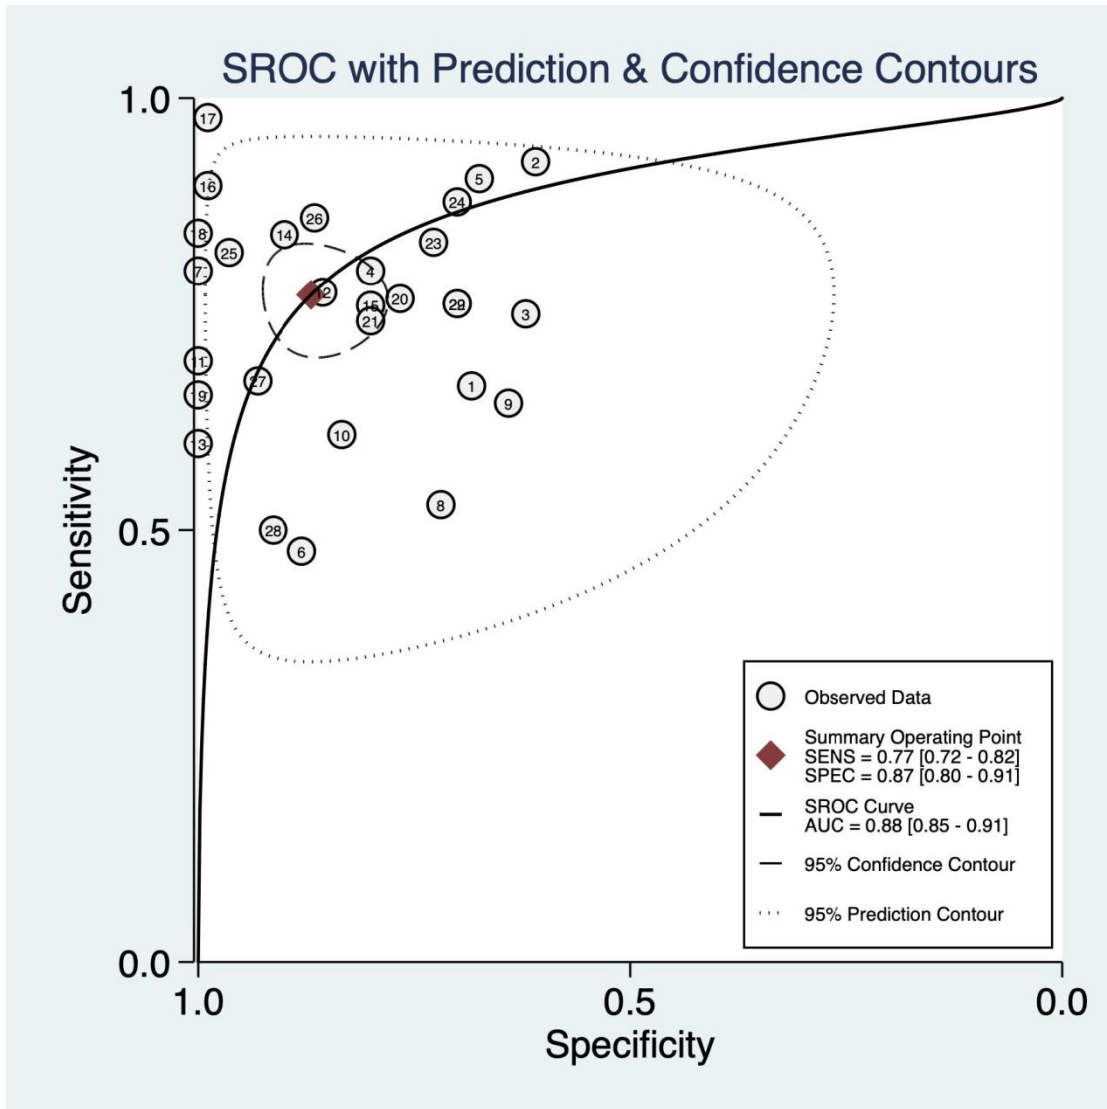

Figure S24. SROC curves of miRNA-21 for diagnosis of lung cancer (NSCLC).



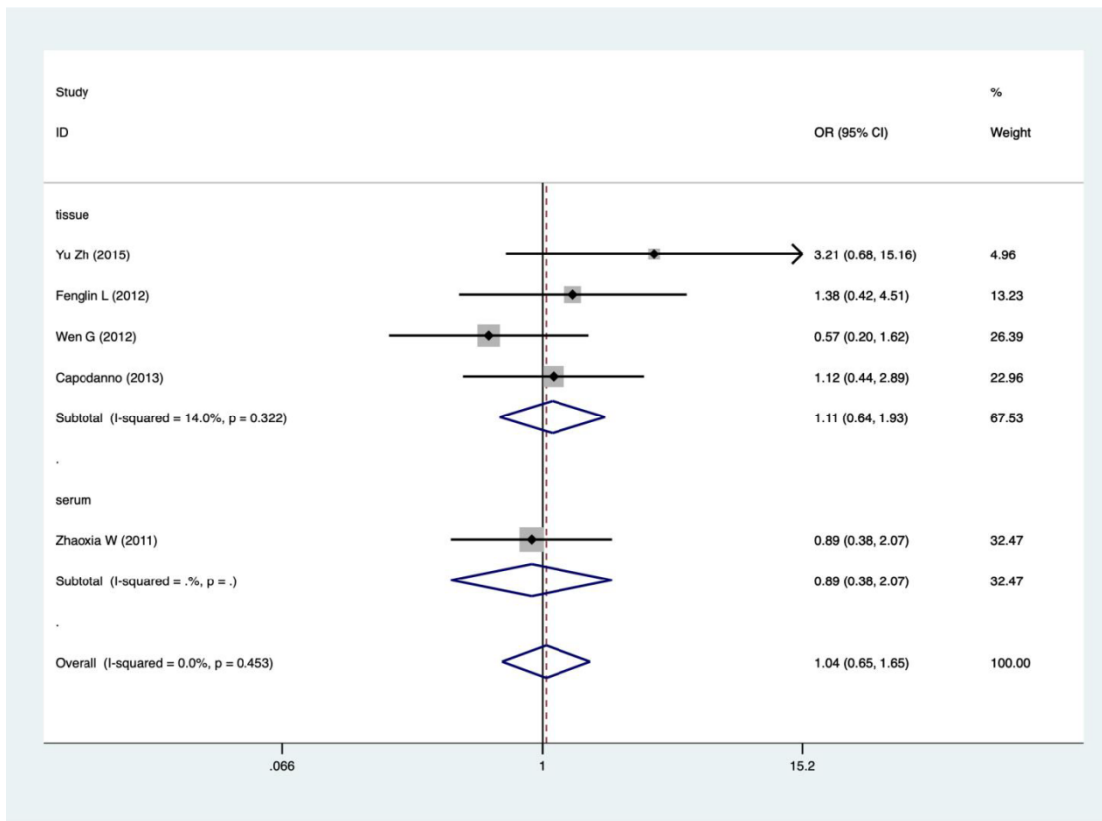

Figure S25. Forest plots of studies evaluating the correlation between miRNA-21 expression and lung cancer (Gender- subgroup of Specimen).

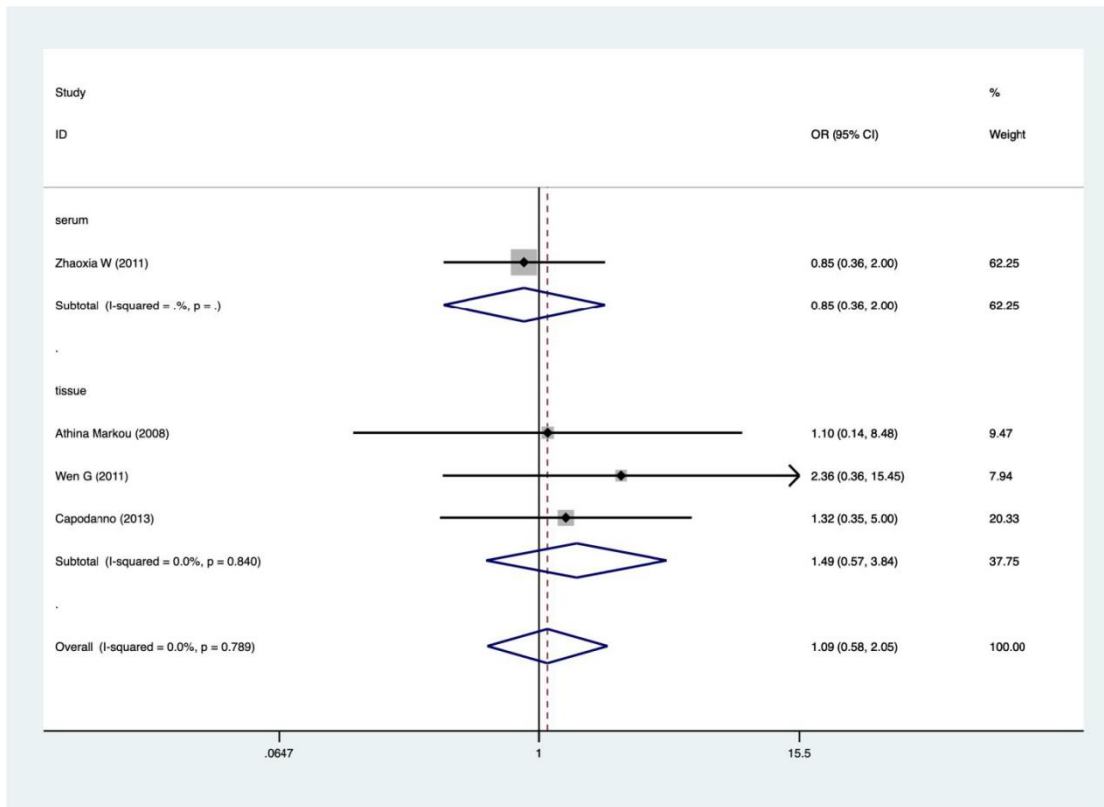

Figure S26. Forest plots of studies evaluating the correlation between miRNA-21 expression and lung cancer (Smoking History - subgroup of Specimen).

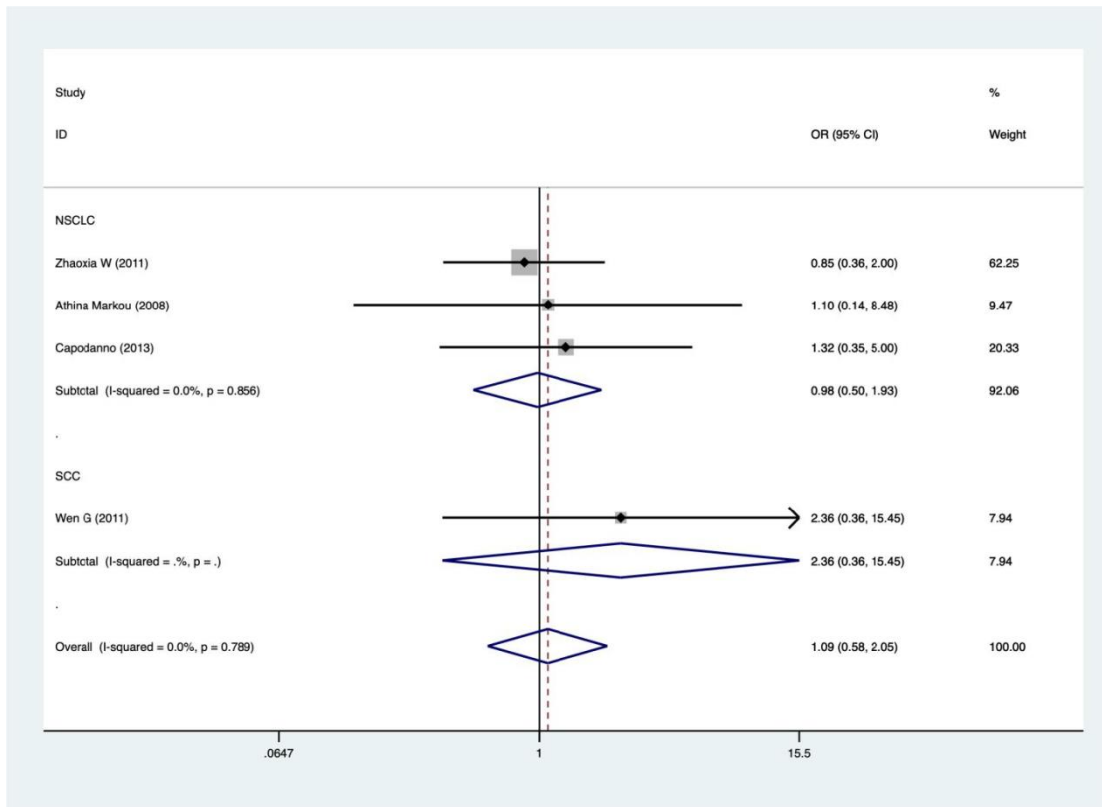

Figure S27. Forest plots of studies evaluating the correlation between miRNA-21 expression and lung cancer (Smoking History - subgroup of Cancer type).

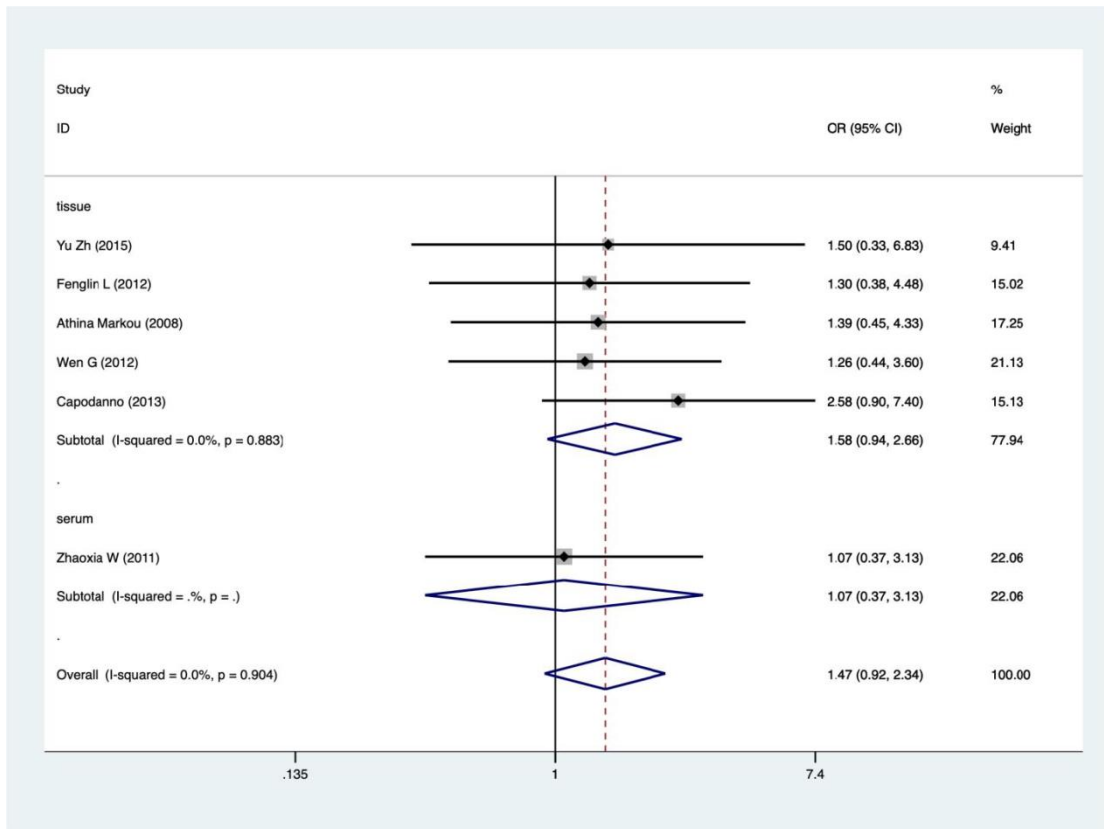

Figure S28. Forest plots of studies evaluating the correlation between miRNA-21 expression and lung cancer (Histological type - NSCLC).

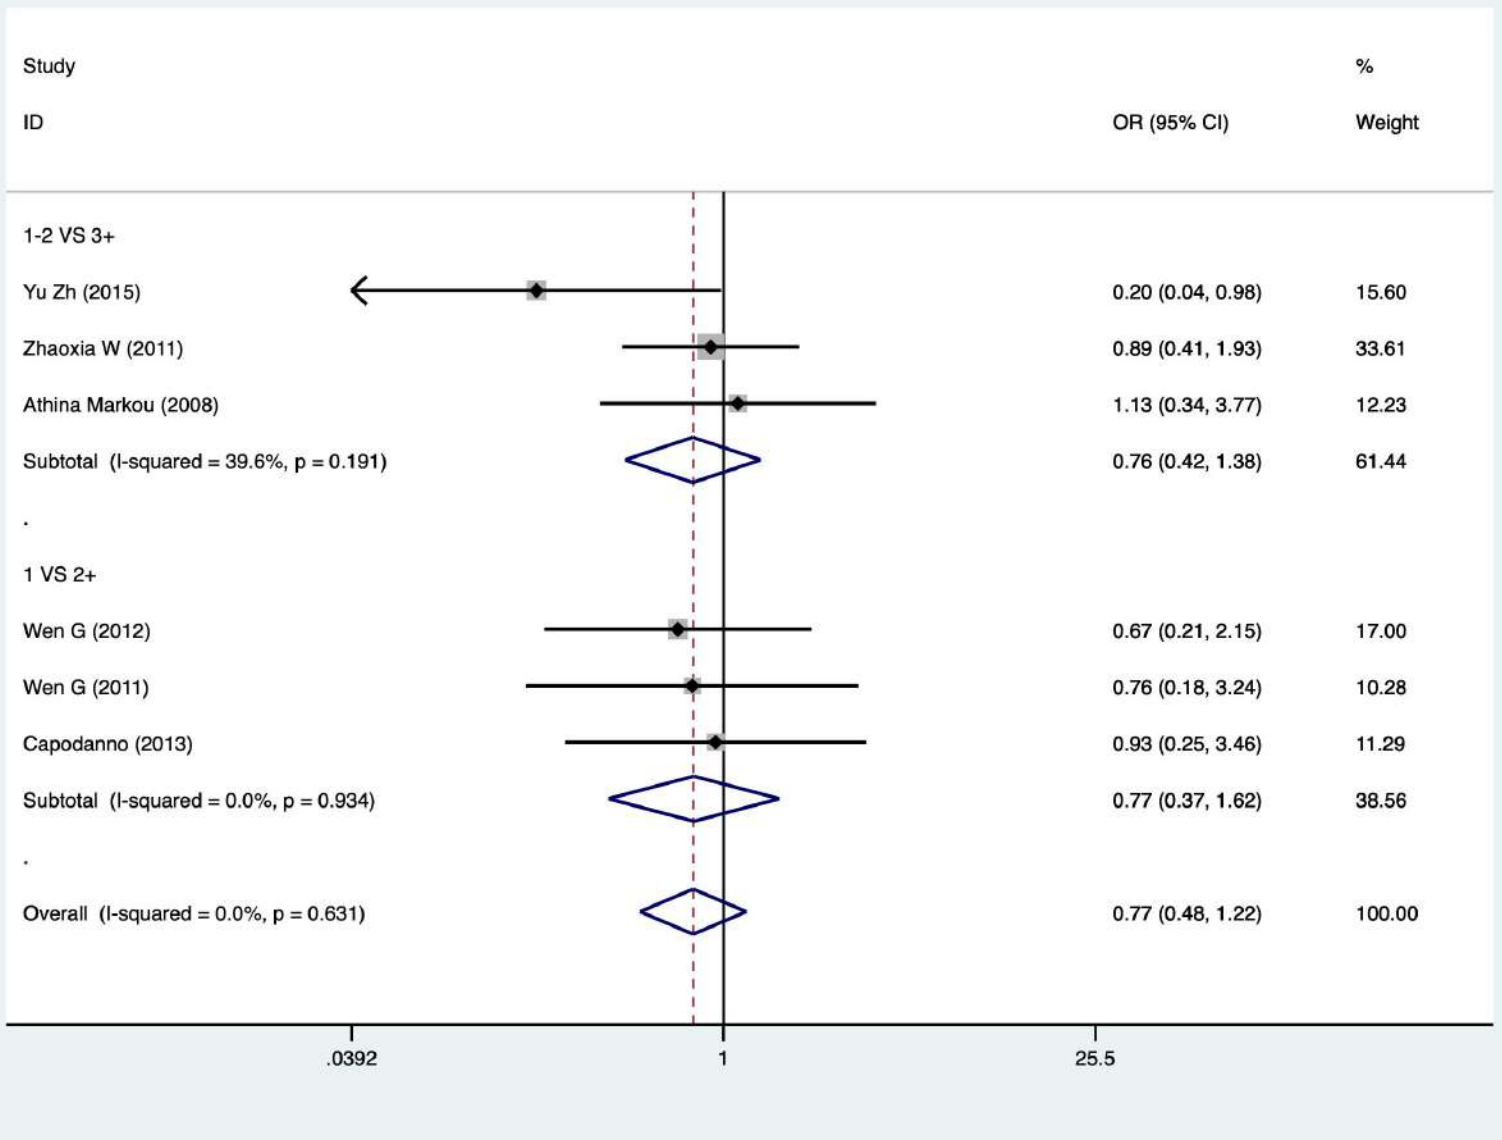

Figure S29. Forest plots of studies evaluating the correlation between the miRNA-21 expression and lung cancer (Pathological staging).

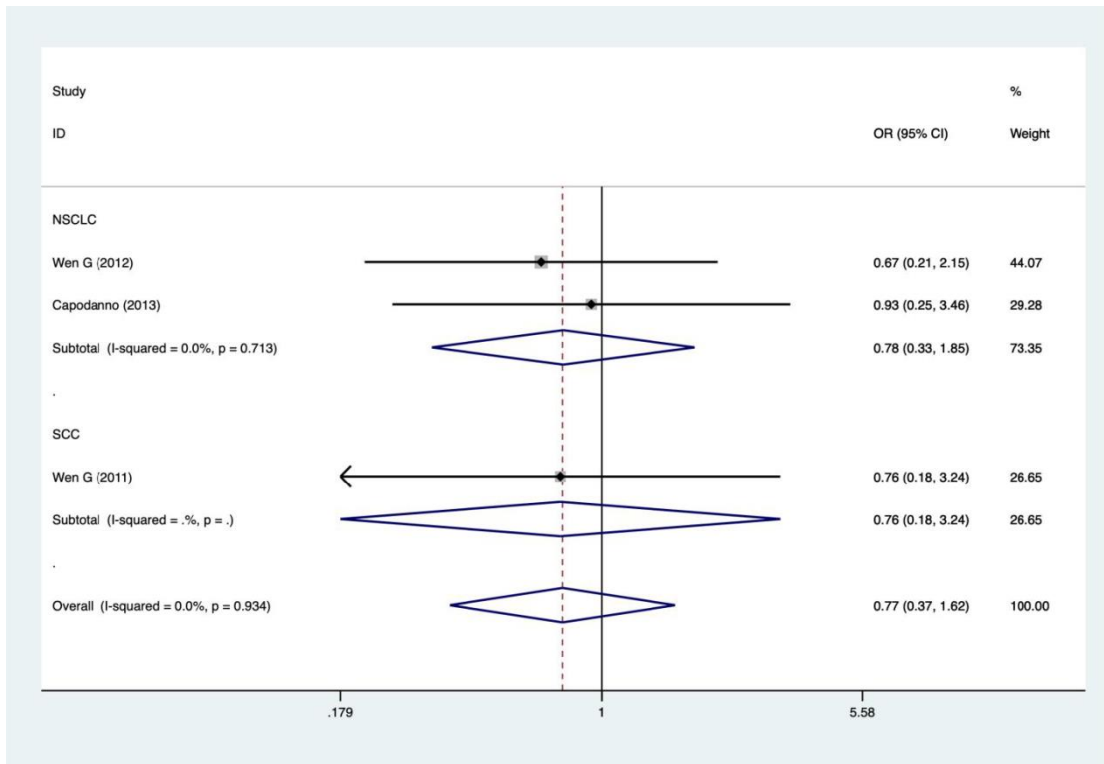

Figure S30. Forest plots of studies evaluating the correlation between miRNA-21 expression and lung cancer (Pathological staging - subgroup of “1 vs 2+”).

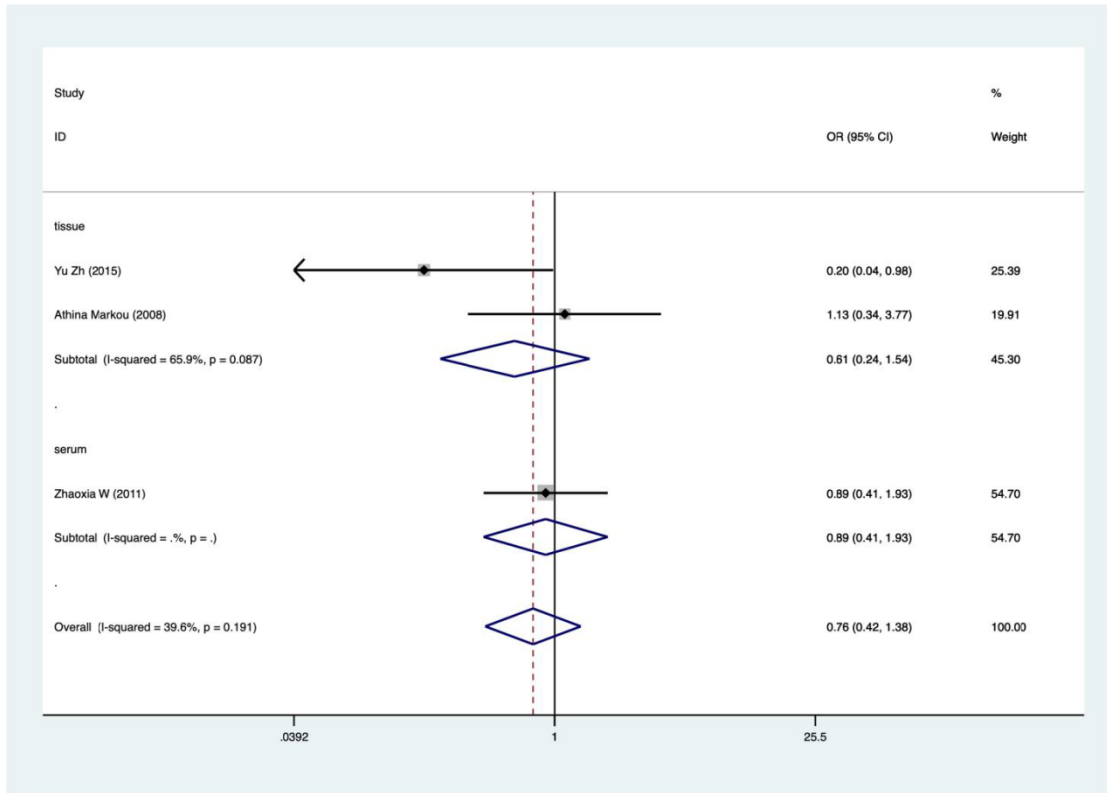

Figure S31. Forest plots of studies evaluating the correlation between miRNA-21 expression and lung cancer (Pathological staging - subgroup of “1-2 vs 3+”).



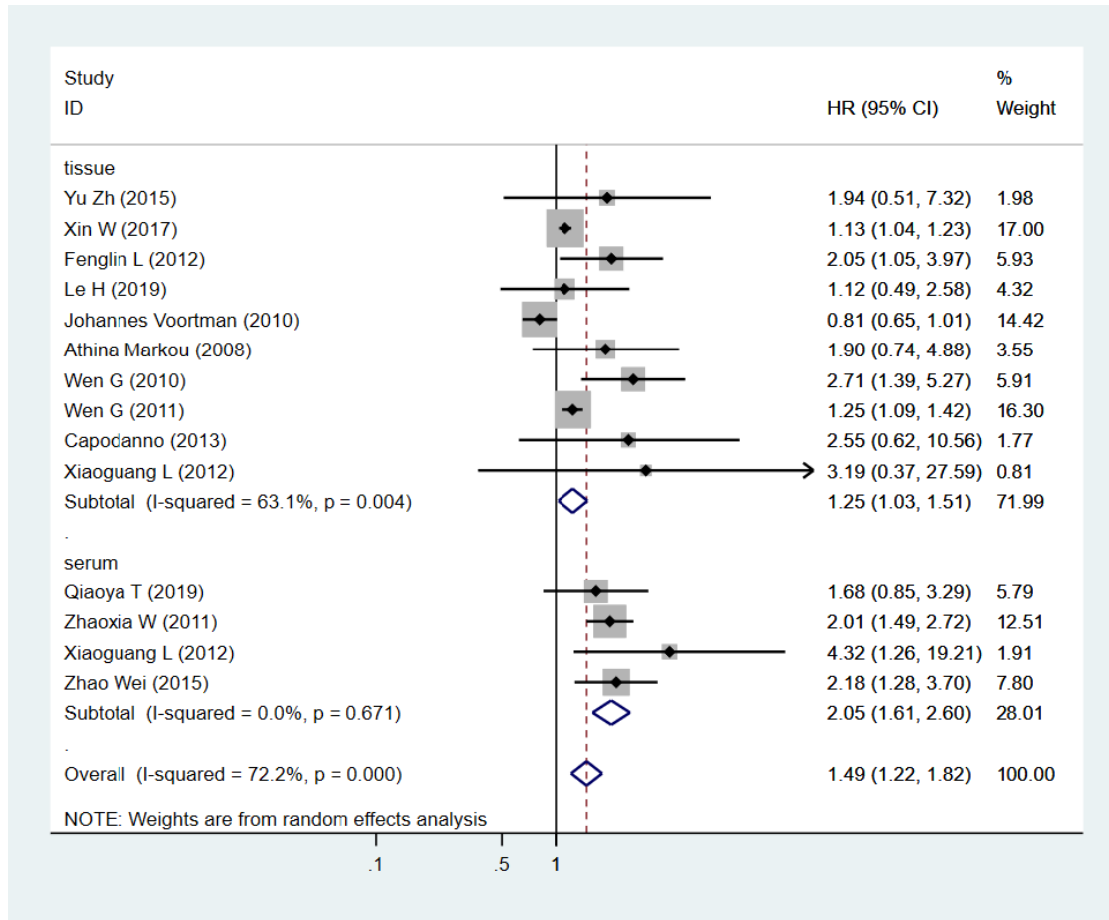

Figure S32. Forest plots on the role of miRNA-21 in prognosis of lung cancer (Univariate analysis of OS - subgroup of Specimen).

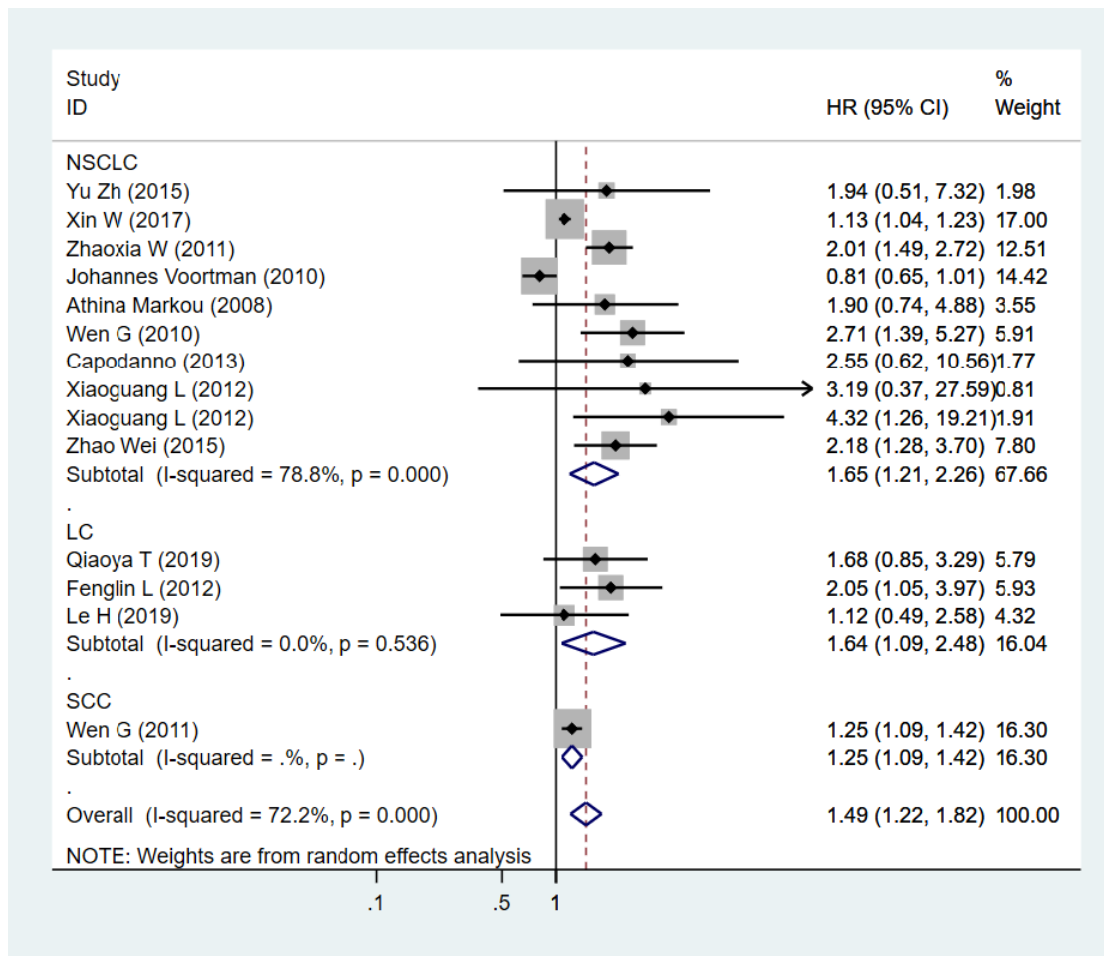

Figure S33. Forest plots on the role of miRNA-21 in prognosis of lung cancer (Univariate analysis of OS - subgroup of Cancer type).

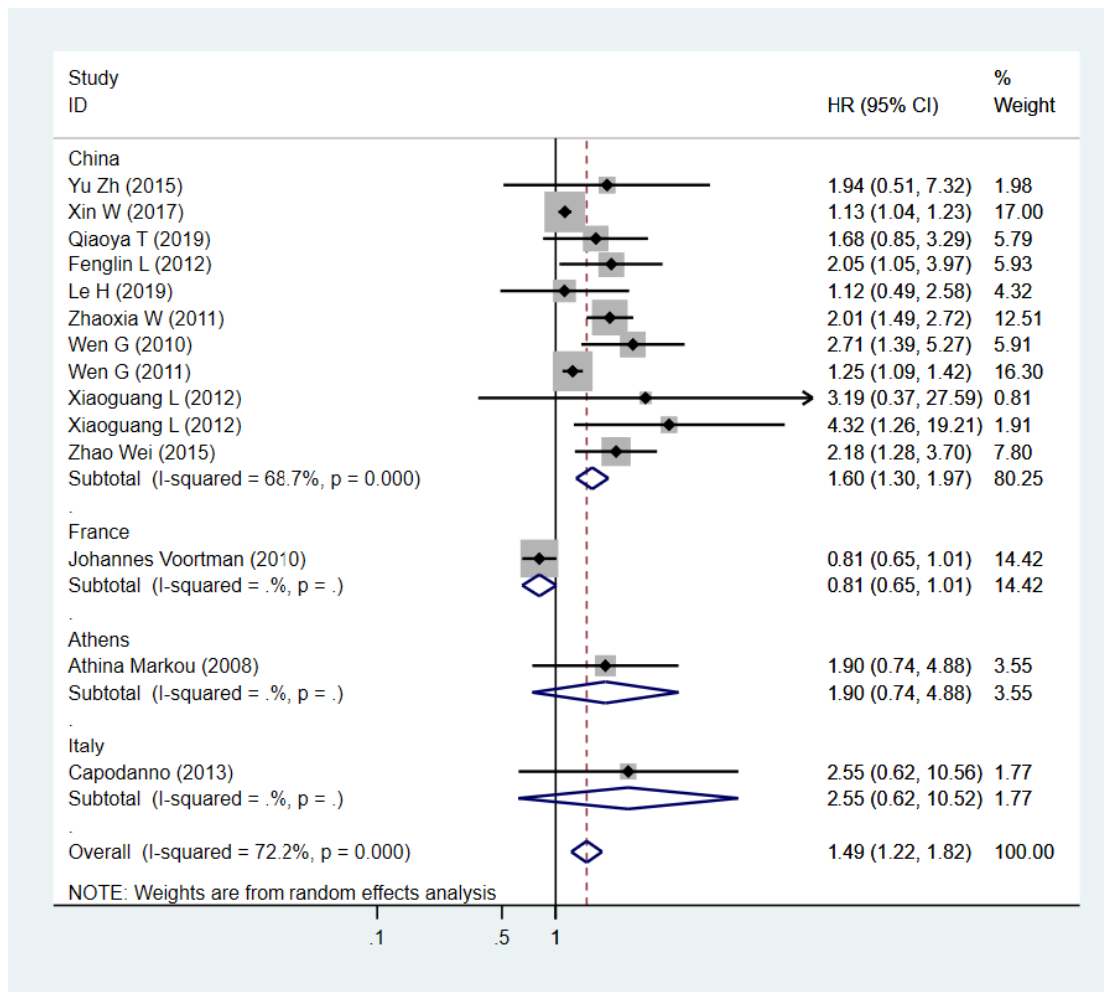

Figure S34. Forest plots on the role of miRNA-21 in prognosis of lung cancer (Univariate analysis of OS - subgroup of Country).

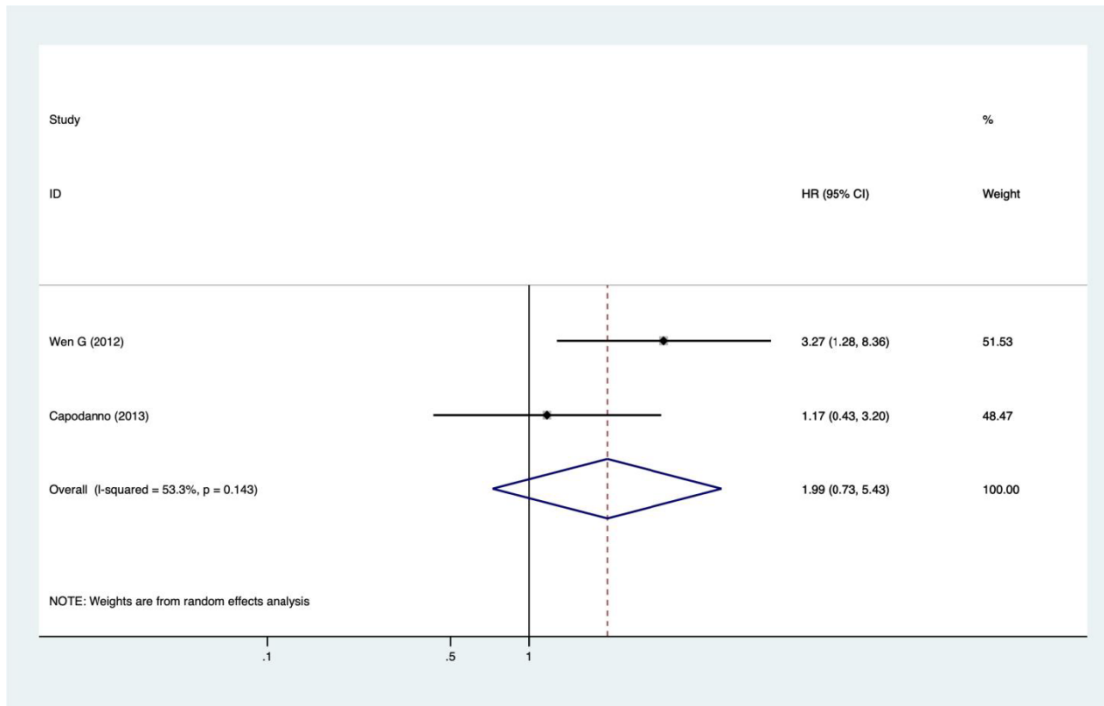

Figure S35. Forest plots on the role of miRNA-21 in prognosis of lung cancer (Univariate analysis of PFS/DFS).

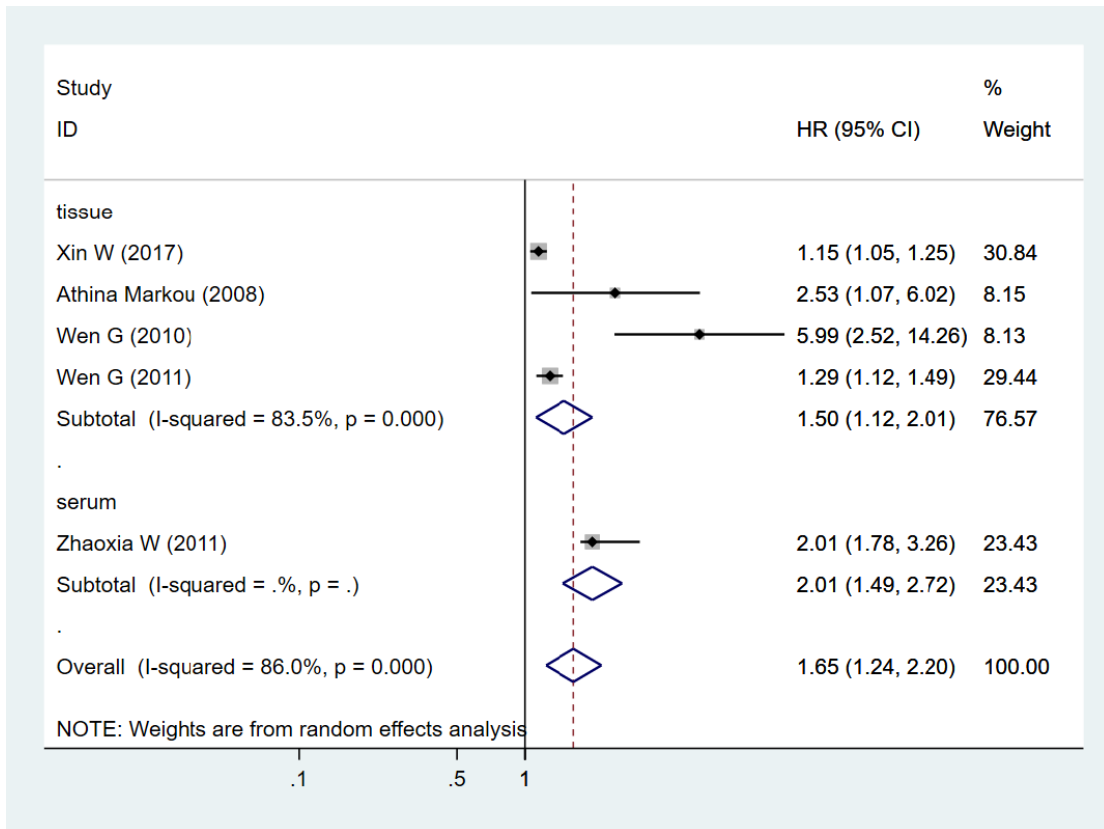

Figure S36. Forest plots on the role of miRNA-21 in prognosis of lung cancer (Multivariate analysis of OS - subgroup of Specimen).

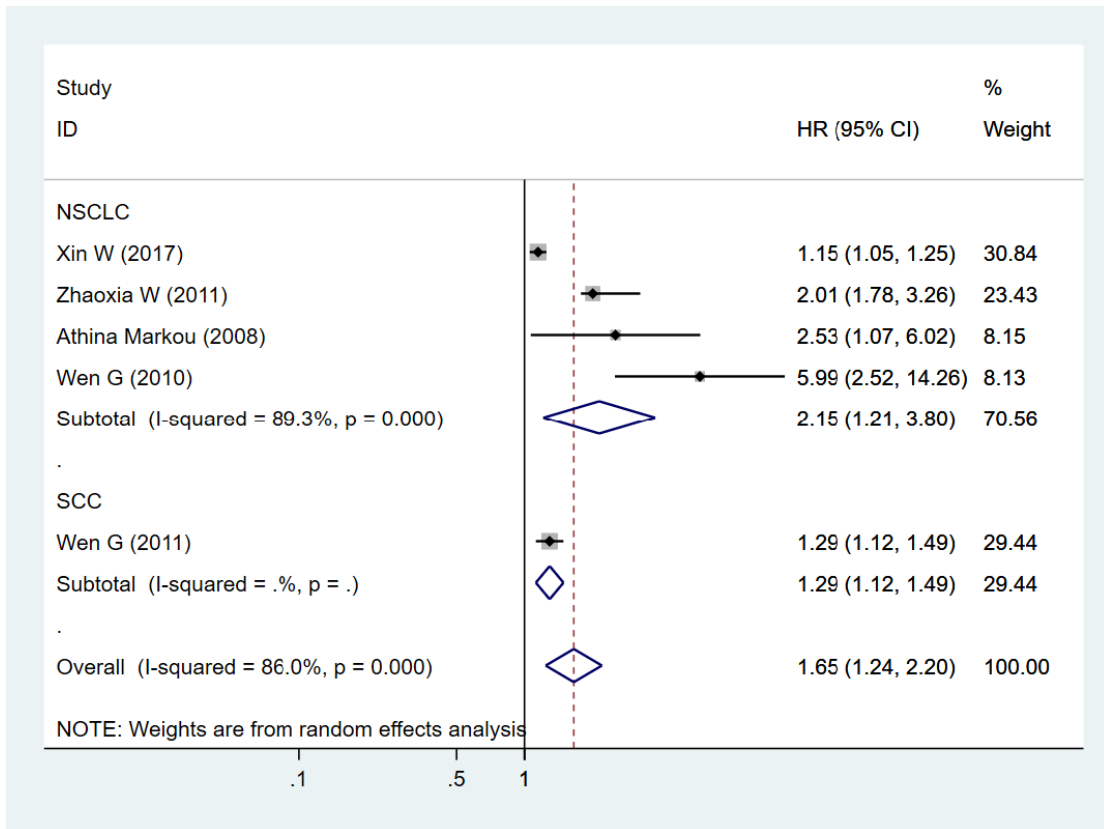

Figure S37. Forest plots on the role of miRNA-21 in prognosis of lung cancer (Multivariate analysis of OS - subgroup of Cancer type).

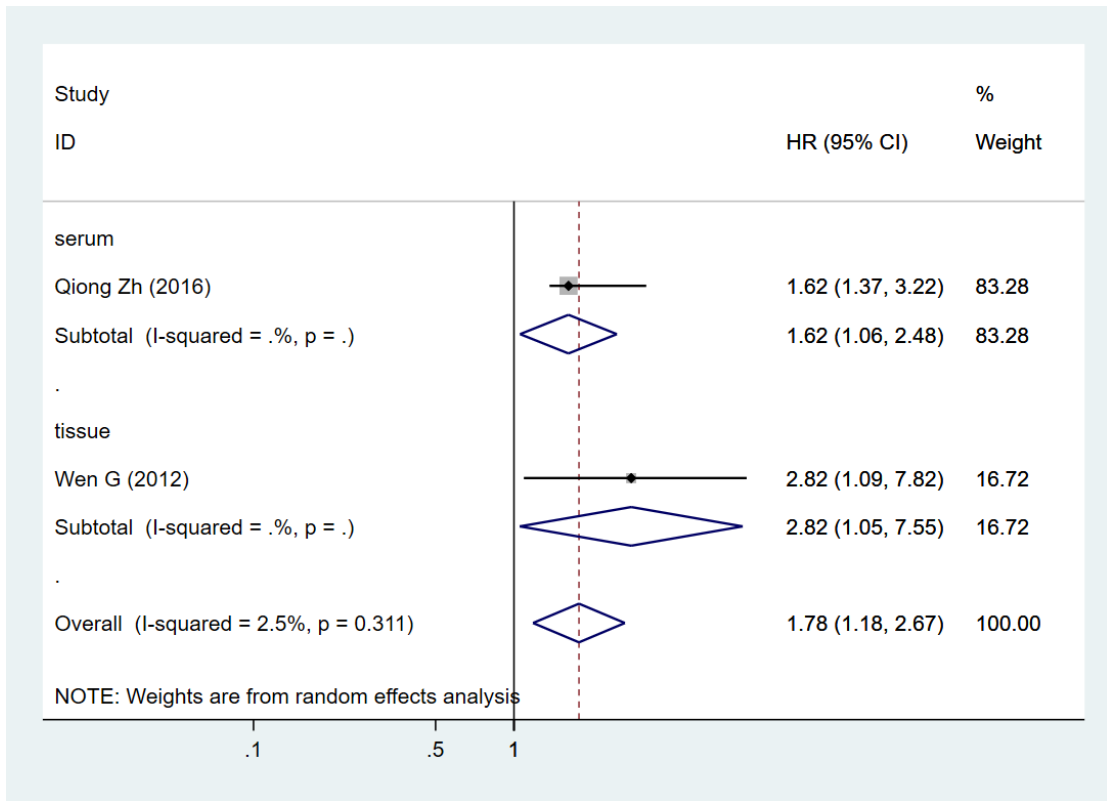

Figure S38. Forest plots on the role of miRNA-21 in prognosis of lung cancer (Multivariate analysis of PFS/DFS - subgroup of Specimen type).
